## 24 2. Abstract

25 The development of spots or lesions symptomatic of the common scab disease on root and  
26 tuber crops is caused by few pathogenic *Streptomyces* with *Streptomyces scabiei* 87-22 as the  
27 model species. Thaxtomin phytotoxins are the primary virulence determinants, mainly acting  
28 by impairing cellulose synthesis, and their production in *S. scabiei* is in turn boosted by the  
29 cello-oligosaccharides released from host plants. In this work we aimed to determine which  
30 molecules and which biosynthetic gene clusters (BGCs) of the specialized metabolism of *S.*  
31 *scabiei* 87-22 show a production and/or transcriptional response to cello-oligosaccharides.  
32 Comparative metabolomic and transcriptomic analyses revealed that molecules of the  
33 virulome of *S. scabiei* induced by cellobiose and cellotriose include i) thaxtomins and  
34 concanamycins phytotoxins (and to a lesser extent N-coronafacoyl-L-isoleucine), ii)  
35 desferrioxamines, scabichelin and turgichelin siderophores in order to acquire iron essential  
36 for housekeeping functions, iii) ectoine for protection against osmotic shock once inside the  
37 host, and iv) bottromycins and concanamycins antimicrobials possibly to prevent other  
38 microorganisms from colonizing the same niche. Importantly, both cell-oligosaccharides  
39 reduced the production of the spore germination inhibitors germicidins and the plant growth  
40 regulators rotihibins. The metabolomic study also revealed that cellotriose is in general a  
41 more potent elicitor of the virulome compared to cellobiose. This result supports an earlier  
42 hypothesis that suggested that the trisaccharide would be the real virulence-triggering factor  
43 released from the plant cell wall through the action of thaxtomins. Interestingly, except for  
44 thaxtomins, none of these BGCs' expression seems to be under direct control of the cellulose  
45 utilization repressor CebR suggesting the existence of another master regulator sensing the  
46 internalization of cello-oligosaccharides. Finally, we found nine additional cryptic and orphan  
47 BGCs that have their expression awakened by cello-oligosaccharides, demonstrating that  
48 other and yet to be discovered metabolites are part of the virulome of *S. scabiei*.

49

### 50 **3. Impact statement**

51 Unveiling the environmental triggers that signal proper conditions for host colonization and  
52 what is the composition of the arsenal of metabolites specialized for this task (the virulome)  
53 is key to understand host-pathogen interactions. In this work, focused on the induction of the  
54 common scab disease caused by *Streptomyces* species, we provided further knowledge to  
55 both aspects i.e., i) highlighting the capability of cellotriase to trigger the entire virulome and  
56 not only the production of thaxtomin phytotoxins, and ii) identifying the set of metabolites  
57 that specifically respond to cello-oligosaccharides emanating from the plant under attack.  
58 Importantly, we also revealed that the expression of nine cryptic/orphan biosynthetic gene  
59 clusters (BGCs) involved in the production of unknown compounds was drastically activated  
60 upon cello-oligosaccharides import suggesting that a significant part of the virulome of *S.*  
61 *scabiei* remains to be discovered. Finally, we unexpectedly found that the expression control  
62 of most of the known and cryptic BGCs does not depend on the cello-oligosaccharide  
63 utilization repressor CebR which suggests the existence of another and yet unknown master  
64 regulator of the virulence in *S. scabiei*.

### 65 **4. Significance as a BioResource to the community**

66 Not Applicable

### 67 **5. Outcome**

68 Not Applicable

### 69 **6. Data summary**

70 [A section describing all supporting external data including the DOI(s) and/or accession numbers(s),  
71 and the associated URL.]

72 The authors confirm all supporting data, code and protocols have been provided within the  
73 article or through supplementary data files. RNAseq data were publicly deposited, and our  
74 experimental and analytical pipeline were described on the GEO database repository  
75 (Accession number: GSE181490)

76

77

## 78 **7. Introduction**

79 *Streptomyces scabiei* (syn. *S. scabies*) is responsible for causing the disease called “common  
80 scab” (CS) on root and tuber crops. Together with a dozen of other phylogenetically related  
81 *Streptomyces* species, *S. scabiei* colonizes and infects underground storage organs like potato  
82 tubers, beets, radishes, turnips, carrots, and peanuts (1,2). CS lesions cause significant  
83 economic losses throughout the world, with potato being the most affected crop. The range of  
84 symptoms and lesion morphologies on potato tubers goes from superficial to raised or deep-  
85 pitted scabs (3). Although CS is characterized by skin defects, it mostly affects the visual  
86 aspect of the tuber tissues and root, sometimes also reducing their size, causing a significant  
87 drop in the quality and marketability of the potato tubers (3).

88 The virulence factors which predominantly contribute to the development of CS are the  
89 thaxtomin phytotoxins which are nitrated diketopiperazines (4). Eleven thaxtomin analogues  
90 have been identified up to date, thaxtomin A being the predominant form associated with the  
91 disease (5–7). While the molecular targets are still unknown, thaxtomin A alters the  
92 expression of host genes involved in cellulose biosynthesis, cell wall remodeling and  
93 strengthening (8,9). Cellulose synthase complexes were also shown to be affected in their  
94 density and motility (8), possibly due to endocytosis triggered by thaxtomin A (10). *In vivo*,  
95 thaxtomin A causes multiple symptoms to plant targets (11) including necrosis, perturbation  
96 of ion fluxes, cell hypertrophy, callose deposition, and ectopic lignin formation. In addition,  
97 wounded or immature sites are affected, inducing synthesis of hemicellulose and pectins and  
98 leading to the deposition and excessive accumulation of layers of periderm (12).

99 Next to thaxtomins, other specialized metabolites are known or predicted to play important  
100 roles in plant colonization and infection by *S. scabiei*. Several studies revealed that  
101 concanamycins and coronafacoyl phytotoxins also contribute to the development of plant  
102 disease (11). In synergy with thaxtomins, concanamycins were shown to play an essential  
103 role in the type and morphology of developed lesions (13). Contrary to concanamycins and  
104 thaxtomins, the exact roles of coronafacoyl phytotoxins in CS disease development are still  
105 relatively vague and were shown to be non-essential for pathogenicity development (11).  
106 However, their impact via modulating jasmonate hormone signalling networks could assist in  
107 overcoming host defence mechanisms (14). N-coronafacoyl-L-isoleucine (CFA-Ile) is the  
108 major product of the coronafacoyl gene cluster (15). A wide spectrum of virulence-associated  
109 activities of CFA-Ile, like tissue hypertrophy, leaf chlorosis and inhibition of root elongation,  
110 were reported in plants. Nevertheless, coronafacoyl phytotoxins are found in non-pathogenic  
111 *Streptomyces* spp. as well, suggesting some additional unidentified roles along with the  
112 already cited disease-related activities (16). Recently, the production of two novel phytotoxic  
113 metabolites was highlighted in *S. scabiei*. Rotihibins C and D are lipopeptides that  
114 significantly reduce the photochemistry efficiency of the photosystem II which in turn affects  
115 the growth of *Arabidopsis thaliana* and *Lemna minor* at low concentrations. At even lower  
116 concentrations, *L. minor* plantlets exhibit an increase in their surface area, suggesting a  
117 hormetic effect of rotihibins (17).

118 Siderophores are also key metabolites for host infecting bacteria, iron being indispensable for  
119 housekeeping functions such as DNA replication and protein synthesis. Next to  
120 desferrioxamines that are essential for *Streptomyces* survival in iron limited environments  
121 (18), *S. scabiei* and related species have the ability to produce diverse and specific

122 siderophores including scabichelin and turgichelin (19), as well as pyochelin (20) together  
123 with three other yet unknown iron chelators deduced from genome mining analysis. This  
124 multitude of siderophores with high affinity for ferric iron would guarantee *S. scabiei* to  
125 capture iron trapped in its hosts. However, although iron acquisition might contribute to the  
126 onset of pathogenicity, *in planta* bioassays showed that there is no connection between  
127 virulence and pyochelin production by *S. scabiei* (20).

128

129 How *S. scabiei* senses the presence of its plant host and triggers its specialized metabolism  
130 required for virulence has also been a main research topic. Induction of thaxtomin  
131 biosynthesis requires the import of cello-oligosaccharides (cellobiose and/or cellotriose) by  
132 the sugar ABC transporter composed by CebE as the sugar-binding component, CebF and  
133 CebG as components of the membrane permease, and MsiK to provide energy to the  
134 transport via ATP hydrolysis (21–23). Once inside the cytoplasm, the imported cello-  
135 oligosaccharides inhibit the DNA-binding ability of the transcriptional repressor CebR which  
136 in turn allows the expression of the *txt* cluster pathway-specific activator TxtR (22,24).

137 If the path from cello-oligosaccharide uptake to activation of thaxtomin biosynthesis is well  
138 described at the molecular level, many questions remain unsolved. The first issue regards  
139 cellobiose itself as a natural environmental elicitor of the CS disease. Most *in vivo* and *in*  
140 *vitro* studies on the induction of the pathogenic lifestyle of *S. scabiei* used cellobiose and not  
141 cellotriose as the triggering factor. The only reason why cellotriose is usually excluded from  
142 laboratory studies is because it is much more expensive and less available in large quantities  
143 compared to cellobiose. However, earlier studies suggested that cellobiose is unlikely to be

144 released from plant cell wall depolymerization by thaxtomins during host colonization by *S.*  
145 *scabiei*. Instead, incubation of tobacco and radish seeds with thaxtomin A showed release of  
146 cellotriose (25). Cellobiose on the other hand, is an important by-product of cellulose  
147 hydrolysis by the cellulolytic system, which naturally occurs upon organic matter turnover by  
148 the soil microflora. However, the ability of *S. scabiei* to degrade cellulose is insignificant  
149 despite possessing a complete cellulolytic system (25–27). While the molecular mechanism  
150 silencing the cellulolytic system of *S. scabiei* is unknown, it avoids the release of cellobiose  
151 from decaying plant biomass, hence preventing this bacterium to be a protagonist in the  
152 mineralization of organic soils. This particularity could be a major evolving adaptation that  
153 somehow “forces” *S. scabiei* to instead colonize living plant tissues. Sensing cellotriose  
154 released by the depolymerization of cellulose caused by thaxtomin, together with silencing  
155 the cellulolytic system and thus avoiding the release of cellobiose, could allow this bacterium  
156 to discriminate if cellulose by-products originate from living or instead dead plant cell walls  
157 (25,27).

158 An even more important question that remains to be solved is the exact composition of the  
159 arsenal of specialized metabolites that constitute the virulome of *S. scabiei*. Are thaxtomins  
160 the only phytotoxins that respond to virulence elicitors or do other specialized metabolites  
161 display the same production response? Recently, the group of Prof Dawn Bignell has shown  
162 that cultivation of *S. scabiei* in the oat bran agar (OBA) medium is not only able to induce  
163 thaxtomin production, but also other specialized metabolites known or predicted to play an  
164 important role in colonizing and infecting the plant host tissues, i.e., CFA-Ile,  
165 concanamycins, siderophores (desferrioxamines and pyochelin), and also a form of auxin  
166 (IAA) (28). OBA is a complex plant-based medium in which cello-oligosaccharides are

167 proposed to be responsible for the induction of thaxtomin production (25). However, it  
168 cannot be excluded that some of the other compounds present in OBA influence – positively  
169 or negatively, alone or in combination – the production of specialized metabolites.

170 As previous studies suggested cellobiose and/or cellotriose to be natural elicitors of the  
171 pathogenic response of *S. scabiei* (27), their specific contribution to the induction of the  
172 metabolome requires further investigation. In this work we wanted to provide answers to  
173 whether cellotriose could – equally to cellobiose – trigger the “virulome” of *S. scabiei* and if  
174 the cello-oligosaccharide mediated induction takes place at the transcriptional level. Our  
175 work revealed that cellotriose is a better inducer of the virulome of *S. scabiei* compared to  
176 cellobiose. Our transcriptomic analysis also shows that cryptic/orphan biosynthetic gene  
177 clusters have their expression awakened by cello-oligosaccharides suggesting that yet  
178 unknown metabolites would be part of the virulome of *S. scabiei*.

179



## 180 **8. Methods**

### 181 **Strain and culture conditions**

182 *Streptomyces scabiei* 87-22 and its  $\Delta cebR$  mutant (22) were routinely cultured in Tryptic Soy  
183 broth (TSB, 30 g/l, Sigma-Aldrich) or ISP2 (for 11: 4 g Yeast Extract, 10 g Malt Extract, 4 g  
184 Dextrose, pH 7.2) liquid media at 28°C under shaking (180 rpm, New Brunswick™ Innova®  
185 44 incubator shaker). Modified thaxtomin defined medium (TDM) ((25), without L-Sorbose)  
186 was used as minimal medium, supplemented with maltose 0.5% (Sigma-Aldrich) in which  
187 cellobiose (Carbosynth) and cellotriose (Megazyme) were added as inducers. Sucrose  
188 (saccharose) was purchased from Merck.

### 189 **Transcriptomics**

#### 190 **Cultures and sampling**

191 Pre-cultures of *S. scabiei* 87-22 (WT) and  $\Delta cebR$  were conducted in 50 ml ISP2 medium  
192 inoculated with  $4 \times 10^7$  spores for 24 hours. The mycelium was collected by centrifugation  
193 (3,500 g for 5 minutes at room temperature (RT)) and washed twice by  
194 resuspension/centrifugation with 20 ml TDM medium without carbon source. The mycelium  
195 was then resuspended in TDM + maltose 0.5% (TDMm) or ISP2 to a density of 16 mg/ml  
196 (wet biomass) and then split into three Erlenmeyer flasks (per strain and culture condition)  
197 containing a culture volume of 25 ml. After 30 minutes of incubation in TDMm at 28 °C, a  
198 first sampling (= time points 0) of 2.5 ml was collected from each flask and cellobiose or  
199 cellotriose were added to a final concentration of 2.5 mM, each into three flasks. The next  
200 samplings were collected following the same procedure, 1 and 2 hours (= time points 1 and 2,

201 respectively) post addition of cello-oligosaccharides. In the ISP2 culture condition involving  
202 *S. scabiei* WT and  $\Delta cebR$ , 2.5-ml samples were collected in each flask after 3 hours of  
203 culture. All samples were collected in 15-ml Falcon tubes and centrifuged for 3 minutes at  
204 3,500 g (RT). The supernatant was quickly and thoroughly removed, and the tubes were  
205 immediately flash-frozen into liquid nitrogen. The frozen cell pellets were placed into a -80  
206 °C freezer until RNA extraction.

### 207 **RNA preparation**

208 The RiboPure™ Bacteria RNA Purification Kit (Invitrogen) was used for total RNA  
209 extraction. The RNAwiz lysis buffer was added to the frozen mycelium pellets and the  
210 procedure was followed according to the manufacturer's guidelines except the bead-beating  
211 step that was extended to 20 minutes. The quantification and quality control of total RNA  
212 samples were performed on a Bioanalyzer 2100 (Agilent). Ribosomal RNA depletion and  
213 library preparation were carried out using the Ovation Complete Prokariotic RNAseq kit  
214 (NuGEN). The libraries were sequenced on a NextSeq® 500 System (Illumina) HM 2X75 bp  
215 read length with 7 million reads per library.

### 216 **Read mapping and differential expression**

217 Sequenced reads were quality-checked and trimmed when necessary, using the Trimmomatic  
218 Software (29). Reads were subsequently mapped to the reference genome (*S. scabiei* 87-22),  
219 using Bowtie2 (30,31), and an average of 98.7% of reads were aligned. For each transcript,  
220 the number of mapped reads were compiled with featureCounts (32), outputting a count table  
221 on which the rest of the analysis is based. Differential expression analysis was performed in

222 R, with the DESeq2 package (33). RNAseq data were publicly deposited, and our  
223 experimental and analytical pipeline were described on the GEO database repository  
224 (Accession number: GSE181490)

## 225 **Metabolomics**

226 After 45 hours of pre-culture in TSB inoculated with  $2 \times 10^7$  spores of *S. scabiei* 87-22, the  
227 mycelium was collected by centrifugation (3,500 g for 5 minutes at RT) and washed twice by  
228 resuspension/centrifugation with 20 ml TDM medium without carbon source. The washed  
229 mycelium was resuspended to a density of 200 mg/ml (wet biomass) and 1 ml was used to  
230 inoculate TDM + maltose 0.5 % (TDMm) plates (25 ml) as overlay. Four conditions were  
231 tested with three biological replicates: TDMm; TDMm + cellobiose 2.5 mM; TDMm +  
232 cellotriose 2.5 mM; TDMm + sucrose 2.5 mM. After 96 hours of incubation at 28 °C, one  
233 half of each plate was extracted with mQ H<sub>2</sub>O (v/v), dried, resuspended in 1 ml of mQ H<sub>2</sub>O,  
234 and filtered through 0.22 µm syringe-driven filters. These metabolic extracts were diluted 20  
235 times in 97/3/0.1 H<sub>2</sub>O/ACN/HCOOH to improve chromatographic and mass spectrometric  
236 performance.

237 The µLC-MS/MS system consisted of a Waters NanoAcquity M-Class UPLC coupled to a  
238 Waters Xevo TQ-S triple quadrupole mass spectrometer fitted with an IonKey/MS<sup>TM</sup> source  
239 (Waters, MA, USA). Mobile phase A was 0.1% formic acid in H<sub>2</sub>O (Biosolve) and mobile  
240 phase B was 0.1% formic acid in acetonitrile (Biosolve). The strong and weak solutions used  
241 to wash the auto-sampler were 0.1% HCOOH in H<sub>2</sub>O and 0.1% HCOOH in  
242 acetonitrile/water/isopropanol (Biosolve) (50:25:25, v/v/v), respectively. The samples were  
243 directly injected (5 µl injection volume) to a Waters 150 µm x 100 mm, 1.8 µm HSS T3,

244 iKey<sup>TM</sup> separation device. The metabolites were eluted from the analytical column using the  
245 following gradient: 0-10 min: 3-50% B, 10-11 min: 50-80% B, 11-15 min: 80% B, 15-16 min  
246 80-3% B, 16-25 min: 3% B at a flow rate of 2 µl/min. The column was operated at 45°C,  
247 ionization was performed in positive mode using a voltage of 3.65 kV. The cone and collision  
248 voltage were set respectively at 35 V and 30 V, and the source temperature was 120°C.

249 Detection was obtained by MRM mode with transitions of the analytes of interest and their  
250 specific retention window ( $\pm$  0.5 min). Selection of these transitions was based on  
251 information in the GNPS public spectral library, literature survey, optimization experiments  
252 and own findings (17) (Table S1). Data acquisition was performed by MassLynx 4.2  
253 software, and the data was subjected to a Savitzky-Golay smoothing in Skyline v21 (Adams  
254 et al. 2020). The Area Under the Curve (AUC) of ion peaks was calculated and normalized to  
255 the TDMm condition for each metabolite. Each complete set of different  
256 conditions/biological replicates were randomly analysed and separately repeated (triplicates).

## 257 **Genome mining**

258 AntiSMASH (antibiotics and secondary metabolites analysis shell; version 5.1.2), available at  
259 <https://antismash.secondarymetabolites.org>, was used for genome mining (34) in combination  
260 with the internal MIBiG 2.0 (Minimum Information about a Biosynthetic Gene cluster)  
261 database (35). The complete genome sequence of *Streptomyces scabiei* 87-22 (Ref  
262 NC\_013929) was used for the prediction of BGCs. Manual inspection was carried out to  
263 rectify the synteny values provided by AntiSMASH, only considering protein sequences  
264 sharing a minimum of 60% of identity on at least 70% of sequence coverage. BGC

265 delimitation and/or attribution issues were manually corrected and supported by literature

266 survey.

267

## 268 9. Results

### 269 The specialized metabolism of *S. scabiei* 87-22

270 Prior to assessing the transcriptomic and metabolomic responses of *S. scabiei* 87-22 to  
271 virulence elicitors, we updated the current knowledge on the BGCs of the specialized  
272 metabolism of this species. A genome mining analysis has recently been performed by Liu et  
273 al. (28), identifying 34 BGCs including eight terpenes, six non-ribosomal peptide synthetases  
274 (NRPSs), six polyketide synthases (PKSs), one hybrid PKS-NRPS BGC, five ribosomally  
275 synthesized and post-translationally modified peptides (RiPPs), four siderophores, and four  
276 other types of BGC (betalactone, butyrolactone, melanin, and ectoine). We performed  
277 additional and manual rounds of inspection (additional BLAST searches and a literature  
278 survey) in order to i) identify possible BGC delimitation issues and correct BGC length, ii)  
279 split individual BGCs into multiple BGCs, and iii) identify BGCs involved in the production  
280 of known natural products absent from the MIBiG database (version 2.0). In total, 12 other  
281 BGCs were identified through these additional steps leading to a final list of 46 BGCs (Table  
282 1). Among these 12 additional BGCs, there was only one BGC for which the natural product  
283 is known, namely BGC#33b coding for melanin. The other 11 BGCs, including BGC#1b  
284 (NRPS), BGC#6b (terpene), BGC#7b (bacteriocin), BGC#16b (lanthipeptide), BGC#23b  
285 (butyrolactone), BGC#23c (LAP), BGC#23d (PKS), BGC#27a (Type 1 PKS), BGC#29a  
286 (Type 3 PKS) and BGC#31b (linaridin) display relatively low similarity levels with genes of  
287 BGCs associated with the biosynthesis of known compounds (Table 1).

288 Over a third of the predicted BGCs (18 out of 46) encode genes involved in the production of  
289 natural products that have already been identified in *S. scabiei* or in other *Streptomyces*

290 species (known BGCs) (Table 1). Half of these (9 out of 18) belong to the so-called core  
291 metabolome (36) i.e., BGCs involved in the biosynthesis of molecules produced by almost all  
292 *Streptomyces* species including 2-methylisoborneol (BGC#5), isorenieratene (BGC#6a),  
293 hopene (BGC#9), geosmin (BGC#12), the WhiE spore pigment (BGC#17), desferrioxamines  
294 (BGC#21), melanins (BGC#22, BGC#33b), and ectoine (BGC#24). The remaining 9 BGCs  
295 of known metabolites were classified into three different functional categories, namely, i)  
296 plant-associated molecules (thaxtomins, the coronafacoyl phytotoxins, concanamycins, and  
297 rothibins), ii) siderophores (pyochelin, scabichelin and turgichelin, in addition to  
298 desferrioxamines), and iii) antimicrobials (informatipeptin, bottromycins, and germicidins).  
299 Note that concanamycins also exhibit antiviral (37) and antifungal (38) activities due to their  
300 capacity to inhibit the V-type H<sup>+</sup> ATPase (39) and therefore could also have been included  
301 into the “antimicrobials” functional category.

302 The remaining 28 BGCs are considered as “cryptic” or “orphan”, i.e., either their product is a  
303 yet undiscovered natural product (unknown unknowns) or is a known compound but the  
304 genetic material responsible for its synthesis is still unknown (unknown knowns) (40).  
305 Nevertheless, different types of natural products deduced by antiSMASH allowed us to sort  
306 these BGCs into different categories. Genome mining predicted four NRPSs (BGC#1b, #11a,  
307 #11b, #25), four terpenes (BGC#6b, #14, #26, #30), four PKSs (BGC#23a, #23d, #27a,  
308 #29a), three siderophores (BGC#10, #15, #32), three lanthipeptides (BGC#4, #16b, #19), two  
309 bacteriocins (BGC#7b, #13), two butyrolactones (BGC#8, #23b), one LAP (BGC#23c), one  
310 indole (BGC#27b), one linaridin (BGC#31b), one betalactone (BGC#2), and one hybrid  
311 PKS-NRPS BGC (BGC#18) (Table 1).

### 312 **Specialized metabolite production upon sensing cellobiose and cellotriose**

313 The effect of cello-oligosaccharides cellobiose and cellotriose on the induction of the  
314 specialized metabolism of *S. scabiei* 87-22 was assessed by targeted liquid chromatography-  
315 multiple reaction monitoring MS (LC-MRM-MS). Figure 1 shows the Area Under the Curve  
316 (AUC) of ion peaks related to known metabolites produced by *S. scabiei* 87-22 (Table S1)  
317 when cultured with or without the environmental virulence elicitors cellobiose and  
318 cellotriose. Expectedly, thaxtomin A was about 5- and 7-fold overproduced in TDMm +  
319 cellobiose and in TDMm + cellotriose, respectively. The greatest production of thaxtomin A  
320 appeared to occur upon culture in the presence of cellotriose compared to cellobiose,  
321 confirming earlier results suggesting that the trisaccharide has a higher triggering effect on  
322 thaxtomin phytotoxin biosynthesis (25). Concanamycins A and B followed the same  
323 production pattern with stronger induction rates: on average 16- and 30-fold increases in  
324 metabolite levels were observed in TDMm + cellobiose and in TDMm + cellotriose,  
325 respectively (Figure 1). In contrast, N-coronafacoyl-L-isoleucine (CFA-Ile) was not  
326 strikingly overproduced compared to other plant-associated metabolites. Indeed, we only  
327 observed about 2-fold overproduction in both conditions where cello-oligosaccharides were  
328 added, and the condition including sucrose displayed similar CFA-Ile levels (Figure 1).

329 Regarding the production patterns of the siderophores produced by *S. scabiei* 87-22, both  
330 desferrioxamines (B and E) showed enhanced production when *S. scabiei* 87-22 was grown  
331 in the presence of cellobiose or cellotriose, with a pattern similar to that observed for  
332 thaxtomin A and concanamycins. Desferrioxamine E was the most overproduced of the two,  
333 especially in TDMm + cellotriose with an average of 19-fold increase in its abundance levels



334 (Figure 1). Scabichelin and turgichelin – both synthesized by BGC#33a – followed the same  
335 trend as desferrioxamines: production increases of about 15- and 25-fold were observed upon  
336 addition of cellobiose and cellotriose, respectively. By contrast, pyochelin production was not  
337 influenced by either of the cello-oligosaccharides, while sucrose had a limited positive effect  
338 of about 2-fold on the siderophore abundance (Figure 1).

339 The production of bottromycins A2 and B2, as well as its other detected forms (D and E, data  
340 not shown), positively responded to the addition of cellobiose and cellotriose (Figure 1).  
341 While there was on average a 13-fold overproduction of these antimicrobial metabolites  
342 following the addition of cellobiose, cellotriose triggered about twice as much (28-fold  
343 increase) production of bottromycins. The production of the osmoprotectant ectoine also  
344 positively responded to the presence of cellobiose and cellotriose, with 14- and 26-fold  
345 overproduction, respectively (Figure 1).

346 Out of all the analysed metabolites, only two types of compounds had their relative  
347 abundance decreased upon cello-oligosaccharide supply i.e., germicidins and rotihibins.  
348 Germicidin A, the inhibitor of *Streptomyces* spore germination, showed a significant decrease  
349 in its production levels in both conditions containing cello-oligosaccharides – about 3-fold in  
350 TDMm + cellobiose and 10-fold in TDMm + cellotriose (Figure 1). The production of  
351 germicidin B displayed the same pattern (data not shown). Similarly, both rotihibins (C and  
352 D), recently identified as a novel category of herbicides produced by *S. scabiei* (17), were  
353 strongly underproduced with decreases of about 30-fold following cellobiose and cellotriose  
354 supply. The addition of sucrose also reduced the amount of rotihibins detected, but to a lower  
355 extent (about 5-fold reduction) (Figure 1).

356 **Transcriptional response of BGCs to cellobiose and cellotriose**

357 **BGC of known metabolites under expression control of cello-oligosaccharides**

358 Next to the metabolomic study described above, we also assessed which BGCs responded to  
359 the environmental triggers cellobiose and cellotriose at the transcriptional level by RNA-seq.  
360 For this, RNA samples were collected 1 and 2 hours post addition of cellobiose and  
361 cellotriose (see Methods for details). From all expression data, we focused on the genes  
362 belonging to the 18 BGCs involved in the production of known specialized metabolites of *S.*  
363 *scabiei* 87-22 (Table 2, Figure 2). We only considered the expression data of the core  
364 biosynthetic gene(s) of each BGC (Table S2) in order to have the best possible correlation  
365 between the transcriptomic data and the metabolomic study described earlier. The  
366 transcriptional response of the core biosynthetic genes of these “known” BGCs upon supply  
367 of cellobiose and cellotriose is displayed in Figures 2A and 2B, respectively, and fold-change  
368 values for the core biosynthetic genes of each BGC are displayed in Table 2.

369 The thaxtomin biosynthesis cluster, designated here as BGC#16a (Table 1), contains two  
370 genes whose expression is known to be triggered by both cellobiose and cellotriose (25).  
371 Therefore, the response of these core biosynthetic genes, *txtA* (*scab\_31791*) and *txtB*  
372 (*scab\_31781*), can be regarded as “positive controls” for cellobiose/cellotriose upregulated  
373 genes. As anticipated, both carbohydrates could drastically increase the transcription of  
374 thaxtomin biosynthetic genes. The best transcriptional activation response for *txtA* and *txtB*  
375 was observed in the cellobiose condition, i.e., 28- and 56-fold upregulation 2 hours post  
376 induction for *txtA* and *txtB*, respectively (Table 2, Figure 2A). Cellotriose was similarly able  
377 to activate the expression of both genes, with the biggest fold change also observed at 2 hours

378 post induction, i.e., 10- and 17-fold upregulation for *txtA* and *txtB*, respectively. Analysis of  
379 the expression patterns of the other *txt* genes revealed that the whole BGC positively  
380 responds to both elicitors, *txtC* displaying the best transcriptional response in the cellobiose  
381 condition, with a 143-fold increased expression at 2 hours post induction (Supplementary  
382 Figure S1). Overall, the results obtained for the *txt* cluster demonstrate that our experimental  
383 set up is appropriate to assess the transcriptional response when *S. scabiei* 87-22 triggers the  
384 expression of its main virulence determinant.

385 Regarding the other BGCs involved in the production of plant-associated molecules, results  
386 from the metabolomic and transcriptomic approaches corroborate. As mentioned above, the  
387 production of concanamycins was highly responsive to both cello-oligosaccharides. The  
388 transcriptomic study confirms this, as the expression of the core biosynthetic genes of  
389 BGC#31a, namely *conABCDEF*, showed an average of 2.6- and 3-fold upregulation in  
390 cellobiose and in cellotriose, respectively. Genes of BGC#28 responsible for CFA-Ile  
391 production also showed a very strong positive expression response to both cello-  
392 oligosaccharides (an average of 14- and 19-fold upregulation for cellobiose and cellotriose,  
393 respectively), which is in line with the two-fold overproduction of CFA-Ile induced by both  
394 cello-oligosaccharides (Table 2, Figure 2). Finally, the analysis of the biosynthetic genes of  
395 rotihibins (BGC#3) revealed that the expression of core genes of this cluster does not  
396 specifically responds to either cellobiose or cellotriose (Table 2, Figure 2), while the results  
397 of our metabolomic analysis suggested a possible down-regulation (Figure 1).

398 Regarding the biosynthetic genes of desferrioxamines (BGC#21), scabichelin and turgichelin  
399 (BGC#33a) siderophores, their expression was also greatly influenced by both saccharides.

400 Transcription of genes responsible for desferrioxamines biosynthesis displayed their greatest  
401 response 2 hours post induction for both elicitors, i.e., 40- and 27-fold upregulation for  
402 cellobiose and cellotriose, respectively. Biosynthetic genes of BGC#33a involved in  
403 scabichelin and turgichelin production were similarly positively affected by cellobiose and  
404 cellotriose with an average of 13- and 9-fold upregulation, respectively (Table 2, Figure 2).  
405 However, the expression of pyochelin biosynthetic genes (BGC#1a) remained quite steady  
406 upon addition of either cello-oligosaccharides, which tends to confirm the metabolomic data  
407 (Table 2, Figure 2).

408 Regarding the BGCs responsible for the production of the antimicrobial compounds  
409 bottromycins, and informatipeptin, none of them showed transcriptional activation upon  
410 addition of either cellobiose or cellotriose (Table 2). Indeed, the transcription of BGC#20 (for  
411 bottromycins) displayed contradicting transcriptional responses (up-regulated or no change at  
412 1 h post induction and down-regulated at 2 h post induction, Figure 2), that overall are not in  
413 line with the remarkable overproduction observed via the comparative metabolomic approach  
414 (Figure 1, see Discussion). BGC#7a, which shows about 60% synteny to the antimicrobial  
415 lanthipeptide informatipeptin, has an expression pattern that was neither influenced by  
416 cellobiose nor cellotriose (Table 2, Figure 2). Finally, BGC#29b associated with germicidin  
417 production is one of the rare BGCs for which transcriptomic and metabolomic analyses do  
418 not correlate, as the absence of transcriptional response is not in line with the marked  
419 decrease in production presented in Figure 1 (see Discussion).

420 Regarding the nine BGCs which belong to the so-called core metabolome of *Streptomyces*  
421 species, the addition of cello-oligosaccharides only significantly influenced the expression of

422 BGC#5 (2-methylisoborneol), BGC#12 (geosmin), and BGC#22 (melanin) (Figure 2, Table  
423 2). The effect of both inducers on the expression of the desferrioxamine BGC – which is part  
424 of the core metabolome – has already been discussed in the section associated with  
425 siderophore BGCs. Cellobiose and cellotriose both activated expression of BGC#5 at almost  
426 the same level – around 3-fold, whereas only cellotriose had an impact on the expression of  
427 the biosynthetic genes of BGC#22 with an average of 7-fold upregulation. Regarding the  
428 osmoprotectant ectoine (BGC#24 in Table 1), we did not observe any significant expression  
429 change which does not correlate with the overproduction measured via the metabolomic  
430 approach.

#### 431 **Cryptic BGCs transcriptionally activated by cello-oligosaccharides**

432 Aside from the 18 BGCs involved in the production of known metabolites, we also assessed  
433 the effect of each cello-oligosaccharide on the expression level of the 28 cryptic or orphan  
434 BGCs deduced from genome mining (Tables 1 and 2). As shown in Figure 3, the expression  
435 of nine cryptic BGCs was influenced by cellobiose or cellotriose. Both carbohydrates  
436 significantly increased the transcription of five BGCs, namely BGC#1b (NRPS), BGC#7b  
437 (bacteriocin), BGC#13 (bacteriocin), BGC#15 (siderophore), and BGC#32 (siderophore)  
438 (Table 2). The highest transcriptional response was observed for the genes of BGC#32  
439 involved in the synthesis of a siderophore metabolite, which were induced up to 28-fold by  
440 cellobiose and 15-fold by cellotriose (Table 2, Figure 3). The transcription of another BGC  
441 coding for an unknown siderophore (BGC#15) was also increased to about 3-fold by both  
442 carbon sources (Table 2, Figure 3). Interestingly, both bacteriocin types of metabolites, i.e.,  
443 BGC#7b and BGC#13, were upregulated by both cello-oligosaccharides. BGC#13 was

444 equally upregulated by both sugars (around 3-fold), whereas the transcriptional response of  
445 BGC#7b was induced more by cellotriose (5.5-fold) compared to cellobiose (2.7-fold). The  
446 presence of the cellobiose and cellotriose also positively influenced the transcription of two  
447 unknown NRPS BGCs (BGC#1b and BGC#25) with an average 5-fold change for BGC#1b  
448 and around 2-fold change for BGC#25 (Table 2, Figure 3).

449 Four other BGCs had their expression upregulated by only one of the two tested cello-  
450 oligosaccharides. Cellobiose could in addition induce the expression of BGC#14 (terpene),  
451 BGC#23a (PKS), and BGC#25 (NRPS) (Figure 3A), whereas cellotriose positively impacted  
452 the expression of BGC#2 (betalactone) (Figure 3B). Importantly, the expression of the core  
453 genes of 19 of the 28 cryptic BGCs remained silent or was not significantly influenced by  
454 cellobiose or cellotriose.

#### 455 **Effect of *cebR* deletion on the expression of cello-oligosaccharide-dependent BGCs**

456 The *txt* cluster responsible for thaxtomin production was previously reported to be under  
457 direct control of the cellulose utilization repressor CebR (22). Two CebR-binding sites have  
458 been discovered within the *txt* cluster which allows the CebR repressor to switch off the  
459 expression of the thaxtomin pathway-specific activator TxtR, in turn resulting in the  
460 transcriptional repression of the whole thaxtomin BGC. Binding of cellobiose and/or  
461 cellotriose to CebR unlocks the system which allows thaxtomin production. According to our  
462 transcriptomic analysis, a total of 16 BGCs have their expression increased by the addition of  
463 either cellobiose and/or cellotriose (Table 2) suggesting a possible role of CebR as direct  
464 transcriptional repressor of other gene clusters of *S. scabiei*. A transcriptome analysis was  
465 thus performed in order to assess which BGCs, beyond the *txt* cluster, would also have their

466 expression under control of CebR. For this, *S. scabiei* 87-22 (wild-type) and its *cebR* null  
467 mutant ( $\Delta$ *cebR*) were cultured in ISP2 liquid medium, and RNA samples were collected 3  
468 hours after culture inoculation with fresh mycelium. The volcano plot in Figure 4 shows the  
469 relative expression of genes that were determined to be “core biosynthetic genes” of the  
470 different BGCs (Table S2). As can be seen in this plot (Figure 4), only one “known” BGC  
471 shows an increased expression in the  $\Delta$ *cebR* mutant, which unsurprisingly corresponds to the  
472 thaxtomin biosynthetic cluster (BGC#16a). However, three additional cryptic clusters see  
473 their core genes’ expression increased, namely, BGC#14, #16b, and #32 coding for terpene,  
474 lanthipeptide, and siderophore specialized metabolites, respectively. In the case of BGC#16b,  
475 we can also observe that only one out of its three core genes fall into the upregulated category  
476 (“UP” at Figure 4). Interestingly, BGC#32 also responded positively to cellobiose and  
477 cellotriose (Table 2) and BGC#14 also showed upregulation upon cellobiose supply (Table  
478 2). However, none of the genes from these cryptic BGCs have been predicted to contain a  
479 CebR-binding site (*cbs*) in their upstream region, meaning it is unlikely that their expression  
480 would be directly regulated by CebR (see Discussion).

481 Based again on core gene differential expression, there is a total of 6 downregulated BGCs,  
482 among which 2 known clusters (BGC#1a and #28), corresponding to the pyochelin and CFA-  
483 Ile biosynthetic clusters. However, these 2 known BGCs showed upregulation upon  
484 cellobiose and/or cellotriose supply (Table 2) suggesting there is an absence of correlation  
485 between the response to cello-oligosaccharides and the inactivation of the DNA-binding  
486 ability of CebR. The four cryptic BGCs that are downregulated correspond to types NRPS  
487 (BGC#1b), bacteriocin (BGC#13), siderophore (BGC#15), and lanthipeptide (BGC#19).

488



## 489 10. Discussion

### 490 Conclusions on metabolites that respond to cello-oligosaccharides

491 Of all the different ways to determine what makes an organism excel in a lifestyle or in an  
492 environmental niche, generating mutants and assessing their phenotypic repercussions is the  
493 most straightforward approach. However, this approach can sometimes lead to erroneous or  
494 questionable conclusions for various reasons, such as gene-function redundancy or genetic  
495 compensation mechanisms that could lead to phenotypes that understate the importance of a  
496 gene. In studies on the CS disease, finding what is really essential for the virulence of *S.*  
497 *scabiei* and related species is thus obviously subjected to these constraints linked to the use of  
498 reverse genetics. For instance, the inactivation of *scab\_1471* in *S. scabiei* resulted in a mutant  
499 strain unable to produce pyochelin but showing no sign of reduced virulence, indicating that  
500 this siderophore is either not essential for pathogenicity, or that its absence is rescued by  
501 other siderophore(s) produced by *S. scabiei* (20). Also, the interference with thaxtomin  
502 production caused by the inactivation of the cellobiose and cellotriose beta-glucosidase BglC  
503 (41) revealed a genetic compensation phenomenon that awakened the expression of  
504 alternative beta-glucosidases allowing *S. scabiei* to maintain the capacity to use cello-  
505 oligosaccharides (42). The experimental set-ups can also sometimes be suboptimal – such as  
506 inappropriate host and/or culture conditions – to observe the real impact of a mutation and  
507 therefore to conclude on the role of a gene product in a biological process. This is for  
508 example the case of CFA-Ile as gene inactivation in *S. scabiei* showed reduced tissue  
509 hypertrophy on potato tuber slices, but the impact of the mutant has only been assessed on  
510 tobacco *in vivo* and not on its natural hosts which questions the relevance of this molecule in  
511 the colonization process (43). Apart from the results on the mutants involved in the

512 biosynthesis of thaxtomins (5,22,23,41), it is thus sometimes difficult to draw conclusions on  
513 the importance of a BGC in contributing to the capacity of *S. scabiei* to colonize and infect  
514 root and tuber plants.

515 For the above-mentioned reasons, we chose approaches alternative to reverse genetics, i.e.,  
516 comparative transcriptomic and metabolomic analyses, to determine which part of the  
517 specialized metabolism of *S. scabiei* would be dedicated to host infection. Both approaches  
518 assume that a large proportion of the molecules/genes required for host colonization will  
519 respond to the same elicitors and therefore will display production or expression patterns that  
520 are synchronized with the main virulence determinants that, in this case, are the thaxtomin  
521 phytotoxins. The results of the metabolomic approach provided a clear picture of the  
522 specialized metabolites of *S. scabiei* that have their production specifically modulated by  
523 cello-oligosaccharides. The cello-oligosaccharide-dependent known metabolites of the  
524 virulome of *S. scabiei* include: i) plant-associated metabolites, namely thaxtomins and  
525 concanamycins phytotoxins (and to a lesser extent CFA-Ile), ii) desferrioxamines, scabichelin  
526 and turgichelin siderophores, iii) the bottromycin antimicrobials, and iv) the osmoprotectant  
527 ectoine. Importantly, of all the known metabolites of *S. scabiei*, germicidins, that are  
528 autoregulatory inhibitors of *Streptomyces* spore germination, are metabolites that had their  
529 production sensibly reduced. Inhibition of germicidin production following the perception of  
530 cellotriose that would emanate from the plant cell wall could be regarded as the first “green  
531 light” to allow the onset of the pathogenic lifestyle of *S. scabiei*. Moreover, the production of  
532 the plant growth regulators rotihibins was drastically reduced after addition of cellobiose and  
533 cellotriose. This response, opposite to the dynamics of thaxtomins, suggests that rotihibins  
534 are not part of the virulome of *S. scabiei*. The absence of virulence bioassays on natural host

535 plants, the presence of clusters homologous to BGC#3 in plant-helping streptomycetes, and  
536 the plant growth promoting effect observed at low doses suggest that rotihibins might be  
537 involved in another aspect of the plant-associated lifestyle, despite exhibiting phytotoxicity at  
538 higher doses (17).

539 Our work showed that there is also a strong positive biosynthetic response of  
540 desferrioxamines, scabichelin and turgichelin siderophores which are molecules usually  
541 produced upon sensing low iron concentrations. Siderophores and iron supply are essential  
542 for the onset of both metabolite production and sporulation in streptomycetes (44–46). We  
543 have also previously shown that when siderophore biosynthesis responds to signals other than  
544 the environmental iron concentration, it can have a strong impact on their developmental  
545 program (47). Such a synchronized production of phytotoxins and siderophores, though still  
546 being a real enigma regarding the molecular mechanism in place, makes perfectly good sense  
547 in terms of host colonization. Iron is mandatory for most housekeeping functions while free  
548 iron is not available within the hosts. The upregulation of two additional cryptic BGCs  
549 predicted to be involved in the biosynthesis of siderophores (see below) further emphasizes  
550 the essential role of iron acquisition during host colonization. Interestingly, Liu et al 2021  
551 reported the absence of production of scabichelin and turgichelin in OBA (19,28), suggesting  
552 that other compounds present in this more complex medium interfere with the elicitor role of  
553 cello-oligosaccharides. It has to be noted that production of turgichelin - together with  
554 scabichelin - by *S. scabiei* (BGC#33a) is reported for the first time in this work. Among the  
555 other metabolites whose production differed with the metabolomic analysis performed in  
556 OBA (28), we could mention bottromycins which were detected in OBA, but with very little  
557 production, while we showed that cello-oligosaccharides strongly induce their production. On

558 the other hand, compounds that were reportedly produced to high levels in OBA – such as  
559 concanamycins, thaxtomins and desferrioxamines – were also detected and overproduced  
560 upon cello-oligosaccharides addition. Finally, in their metabolomic analysis, Liu and  
561 colleagues (28) also highlighted the abundance of CFA-Ile in OBA culture extracts (also  
562 shown in (43)). The presence of CFA-Ile in our culture extracts indicates an important role  
563 for this molecule in the virulome, even though the addition of cello-oligosaccharides only has  
564 a limited positive impact on CFA-Ile production (Figure 1), while we observed massive  
565 overexpression via our transcriptomic analysis (Figure 2 and Table 2). Surprisingly, we  
566 previously reported in a proteomic study that the abundance of two proteins of the CFA-Ile  
567 biosynthetic pathway – SCAB79611 (Cfa2) and SCAB79671 (CFL) – significantly decreased  
568 upon cellobiose addition (48). Altogether, these results suggest that the production levels and  
569 the expression response of CFA-Ile biosynthetic proteins/genes are highly sensitive to the  
570 chosen culture conditions which could explain the important differences between our  
571 experimental setup conducted here in minimal media and earlier studies.

572 Additional metabolites – identified in a previous study (28) – were found in all the tested  
573 culture conditions. Production of aerugine, andrachcinidine, Cyclo(L-Val-L-Pro), and a form  
574 of the plant hormone auxin (Indole-3-acetic acid - IAA) was more or less influenced by the  
575 addition of cello-oligosaccharides, but not dramatically (Figure S2). Only andrachcinidine, an  
576 alkaloid metabolite putatively involved in plant defence, was induced by cellobiose and the  
577 production of IAA was reduced by a factor two in TDMm + cellobiose and cellotriose.  
578 Further research is required to link these metabolites with their currently cryptic BGCs,  
579 except for IAA whose biosynthetic genes have previously been identified (49). On the other  
580 hand, the presence of additional metabolites described by Liu and colleagues (28) was

581 investigated, but none of them was found in our extracts. These metabolites were: mairine B,  
582 bisucaberin, dehydroxynocardamines, and 211 A decahydroquinoline. Informatipeptin – a  
583 bioactive compound associated with antimicrobial activity – most-likely produced by  
584 BGC#7a could not be detected in any of our extracts.

### 585 **Cellobiose versus cellotriose as elicitors of virulence**

586 Another question we wanted to address through this work is whether cellotriose could,  
587 equally to cellobiose, trigger the “virulome” of *S. scabiei*. Indeed, if most studies have been  
588 performed with cellobiose as elicitor - the product being much less expensive and available in  
589 larger quantities compared to cellotriose -, earlier works suggest that instead, cellotriose is  
590 more likely to emanate from living plants considering the cell wall-related action of  
591 thaxtomins. Indeed, cellotriose was shown to be naturally released from actively growing  
592 plant tissue, and a treatment with pure thaxtomin A increased the amount of cellotriose  
593 exuded by radish seedlings (25). On the other hand, we proposed that cellobiose would rather  
594 result from cellulolytic degradation of dead plant material (27). Our metabolomic and  
595 transcriptomic analyses revealed that cellobiose and cellotriose are able to induce a similar  
596 response. It is however important to note that for most metabolites of the virulome,  
597 cellotriose was a stronger inducer compared to cellobiose (Figure 1). Even for germicidins,  
598 one of the two metabolites whose production is reduced and not increased by cello-  
599 oligosaccharides, cellotriose had a stronger impact. One possible explanation is that, once  
600 internalized, cellotriose is hydrolysed to cellobiose and glucose by the beta-glucosidase BglC,  
601 therefore further providing the disaccharide eliciting molecule in the intracellular  
602 compartment. However, once inside the cell, the hydrolysis of cellobiose by BglC generates

603 two molecules of glucose that will feed glycolysis (primary metabolism) and no longer act as  
604 trigger for the specialized metabolism of *S. scabiei*. In contrast, our transcriptomic analysis  
605 suggested that cellobiose was in general a better elicitor compared to cellotriose (Figure 2 and  
606 3). This is not surprising as we showed that the import of cellobiose is faster than that of  
607 cellotriose in *S. scabiei* (41), which explains the observed slower transcriptional response.  
608 Also, RNA samples were collected after 1 h and 2 h post addition of either cello-  
609 oligosaccharides while the extracts for the metabolomic analysis were collected after 96 h of  
610 growth. The short-term transcriptional response thus cannot be quantitatively compared to the  
611 long-term metabolite production response.

612 The most important observation is that, for the large majority of BGCs and known  
613 metabolites that have been investigated here, we saw a clear correlation between the data  
614 obtained via the transcriptomic and metabolomic approaches. Among the few exceptions we  
615 can mention the case of the osmoprotectant ectoine, its production being highly induced by  
616 both cello-oligosaccharides (Figure 1) while we could not see significant expression changes  
617 (Figure 2 and Table 2). The most plausible explanation lies in the fundamental difference in  
618 the culture conditions as samples for RNA-seq analyses were collected from liquid cultures  
619 just after the addition of the elicitors while metabolite samples were extracted from 96 hours  
620 solid cultures. Osmotic protection is expected to be more important after 96-hours cultures at  
621 the agar-air interface compared to a couple of hours in liquid cultures with no osmotic  
622 changes. The expression of genes involved in ectoine biosynthesis could also be controlled by  
623 development-related signals or regulators that are not yet available at RNA sampling time  
624 points. Also, no correlation was observed between the strongly reduced germicidin  
625 production (Figure 1) and the negligible transcriptional response of the corresponding

626 BGC#29a (Figure 2 and Table 2). Again, the lack of expression change could be explained by  
627 the differences in culture conditions. Finally, the transcriptional response of the BGC#20 for  
628 bottromycins was too irregular (up-, down-regulation, or no changes according to the elicitors  
629 and time points) to make any correlation with the strong overproduction observed via the  
630 metabolomic study.

### 631 **CebR-independent response of most cello-oligosaccharide-dependent BGCs**

632 Surprisingly, except for the thaxtomin gene cluster, only 2 of the 15 other BGCs that showed  
633 a strong transcriptional response to cellobiose and cellotriose also showed overexpression in  
634 the  $\Delta cebR$  mutant (Figure 4). This result, though unexpected, is in line with the absence of  
635 CebR-binding sites in the upstream region of pathway-specific transcriptional activators and  
636 core biosynthetic genes of these cello-oligosaccharide expression-dependent BGCs. Through  
637 our earlier proteomic analysis, we also observed that many proteins whose production was  
638 activated in *S. scabiei* 87-22 by cellobiose did not show production changes in the *cebR* null  
639 mutant (48). This could be explained by the possible ability of CebR to bind to “non-  
640 canonical” DNA sequences, as previously observed for other transcription factors that also  
641 link nutrient sensing and the specialized metabolism (50). Alternatively, cellobiose and  
642 cellotriose could be sensed by another and yet unknown transcription factor.

### 643 **Cryptic metabolites and perspectives**

644 Although strain *S. scabiei* 87-22 is rather well-studied as a model organism, the plurality of  
645 its cryptic and/or silent BGCs highlighted a huge reservoir of yet unknown metabolites. Nine  
646 of these cryptic BGCs showed a significant response to either both or one of the two cello-

647 oligosaccharides, suggesting that some of these unknown compounds may also be part of the  
648 virulome of *S. scabiei*. The best transcriptional response was observed for BGC#32 (Table 2)  
649 involved in the synthesis of a siderophore type metabolite. Together with the transcriptional  
650 awakening of BGC#15, the cello-oligosaccharide-dependent response of siderophore-related  
651 BGCs further underlines the importance of iron acquisition during host colonization. We also  
652 observed the positive expression changes for two BGCs responsible for the production of two  
653 bacteriocin type metabolites (BGC#7b and #13). The strain-specificity of these antibacterial  
654 peptides is unknown but their synchronized biosynthesis with other host colonization  
655 molecules could be seen as a strategy to prevent competing soil-dwelling bacteria to also  
656 access the starch reservoir of tubers.

657 The structure and the bioactivity of the metabolites whose production is triggered by  
658 cellobiose and cellotriose is currently under investigation and should lead to the identification  
659 of new key virulence determinants associated with the common scab disease.

660

## 661 **11. Author statements**

### 662 **11.1 Authors and contributors**

663 Benoit Deflandre: Conceptualization, Formal analysis, Investigation, Methodology,  
664 Supervision, Visualization, Writing – original draft

665 Nudzejma Stulanovic: Formal analysis, Investigation, Software, Visualization, Writing –  
666 original draft

667 Sören Planckaert: Formal analysis, Investigation, Methodology, Writing – review & editing

668 Sinaeda Anderssen: Data curation, Formal analysis, Methodology, Software, Visualization,  
669 Writing – review & editing



- 670 Beatrice Bonometti: Investigation
- 671 Latifa Karim: Investigation, Methodology, Resources
- 672 Wouter Coppieters: Methodology, Project administration, Resources, Supervision
- 673 Bart Devreese: Funding acquisition, Methodology, Project administration, Supervision,  
674 Writing – review & editing
- 675 Sébastien Rigali: Conceptualization, Funding acquisition, Methodology, Project  
676 administration, Supervision, Visualization, Writing – original draft
- 677

678 **11.2 Conflicts of interest**

679 The authors declare that there are no conflicts of interest

680 **11.3 Funding information**

681 The work of S.R. and Be.D was supported by an Aspirant grants from the FNRS (grant  
682 1.A618.18) and FRIA grants from the FNRS for S.R. and S.A. (FRIA 1.E.031.18-20) and  
683 S.R. and N.S. (FRIA 1.E.116.21). Ba.D. and S.P. were also supported by a Bijzonder  
684 Onderzoeksfonds (BOF, grant 01B08915)-basic equipment from the Ghent University special  
685 research funds. S.R. is a Fonds de la Recherche Scientifique (FRS-FNRS) senior research  
686 associate.

687 **11.4 Ethical approval**

688 Not applicable

689 **11.5 Consent for publication**

690 Not applicable

691 **11.6 Acknowledgements**

692 *[An Acknowledgements section is not compulsory. However, if materials and results were obtained*  
693 *from outside the authors' laboratories (e.g. production of antibodies, properties of strains), this must*  
694 *be acknowledged.]*

695

696

## 697 12. References

- 698 1. Goyer C, Beaulieu C. Host range of streptomycete strains causing common scab. *Plant Dis.*  
699 1997;81(8):901–4.
- 700 2. Loria R, Bukhalid RA, Fry BA, King RR. Plant pathogenicity in the genus *Streptomyces*. *Plant*  
701 *Dis.* 1997;81(8):836–46.
- 702 3. Wanner LA, Kirk WW. *Streptomyces* – from Basic Microbiology to Role as a Plant Pathogen.  
703 *Am J Potato Res.* 2015;92(2):236–42.
- 704 4. King RR, Lawrence CH, Clark MC. Correlation of phytotoxin production with pathogenicity  
705 of *Streptomyces scabies* isolates from scab infected potato tubers. *Am Potato J.*  
706 1991;68(10):675–80.
- 707 5. Healy FG, Wach M, Krasnoff SB, Gibson DM, Loria R. The *txtAB* genes of the plant pathogen  
708 *Streptomyces acidiscabies* encode a peptide synthetase required for phytotoxin thaxtomin A  
709 production and pathogenicity. *Mol Microbiol.* 2000;38(4):794–804.
- 710 6. King RR, Calhoun LA. The thaxtomin phytotoxins: Sources, synthesis, biosynthesis,  
711 biotransformation and biological activity. *Phytochemistry* [Internet]. 2009;70(7):833–41.  
712 Available from: <http://dx.doi.org/10.1016/j.phytochem.2009.04.013>
- 713 7. Loria R, Bignell DRD, Moll S, Huguet-Tapia JC, Joshi M V., Johnson EG, et al. Thaxtomin  
714 biosynthesis: The path to plant pathogenicity in the genus *Streptomyces*. *Antonie Van*  
715 *Leeuwenhoek.* 2008;94:3–10.
- 716 8. Bischoff V, Cookson SJ, Wu S, Scheible W-R. Thaxtomin A affects CESA-complex density,  
717 expression of cell wall genes, cell wall composition, and causes ectopic lignification in  
718 *Arabidopsis thaliana* seedlings. *J Exp Bot.* 2009;60(3):955–65.
- 719 9. Duval I, Beaudoin N. Transcriptional profiling in response to inhibition of cellulose synthesis  
720 by thaxtomin A and isoxaben in *Arabidopsis thaliana* suspension cells. *Plant Cell Rep.*  
721 2009;28(5):811–30.
- 722 10. Tateno M, Brabham C, DeBolt S. Cellulose biosynthesis inhibitors - A multifunctional  
723 toolbox. *J Exp Bot.* 2016;67(2):533–42.
- 724 11. Li Y, Liu J, Díaz-Cruz G, Cheng Z, Bignell DRD. Virulence mechanisms of plant-pathogenic  
725 *Streptomyces* species: An updated review. *Microbiology.* 2019;165(10):1025–40.
- 726 12. Khatri BB, Tegg RS, Brown PH, Wilson CR. Temporal association of potato tuber  
727 development with susceptibility to common scab and *Streptomyces scabiei*-induced responses  
728 in the potato periderm. *Plant Pathol.* 2011;60(4):776–86.
- 729 13. Natsume M, Tashiro N, Doi A, Nishi Y, Kawaide H. Effects of concanamycins produced by  
730 *Streptomyces scabies* on lesion type of common scab of potato. *J Gen Plant Pathol.*  
731 2017;83:78–82.
- 732 14. Gimenez-Ibanez S, Chini A, Solano R. How microbes twist jasmonate signaling around their  
733 little fingers. *Plants.* 2016;5 (1)(9):323–9.

- 734 15. Fyans JK, Altowairish MS, Li Y, Bignell DRD. Characterization of the coronatine-like  
735 phytotoxins produced by the common scab pathogen *Streptomyces scabies*. Mol Plant-Microbe  
736 Interact. 2015;28(4):443–54.
- 737 16. Bignell DRD, Cheng Z, Bown L. The coronafacoyl phytotoxins: structure, biosynthesis,  
738 regulation and biological activities. Antonie Van Leeuwenhoek [Internet]. 2018;111(5):649–  
739 66. Available from: <https://doi.org/10.1007/s10482-017-1009-1>
- 740 17. Planckaert S, Deflandre B, de Vries A-M, Ameye M, Martins JC, Audenaert K, et al.  
741 Identification of Novel Rotihibin Analogues in *Streptomyces scabies* including Discovery of  
742 its Biosynthetic Gene Cluster. Microbiol Spectr. 2021;Accepted(for publication).
- 743 18. Argüelles Arias A, Lambert S, Martinet L, Adam D, Tenconi E, Hayette M-P, et al. Growth of  
744 desferrioxamine-deficient *Streptomyces* mutants through xenosiderophore piracy of airborne  
745 fungal contaminations. FEMS Microbiol Ecol. 2015;91(7):1–9.
- 746 19. Kodani S, Bicz J, Song L, Deeth RJ, Ohnishi-Kameyama M, Yoshida M, et al. Structure and  
747 biosynthesis of scabichelin, a novel tris-hydroxamate siderophore produced by the plant  
748 pathogen *Streptomyces scabies* 87.22. Org Biomol Chem. 2013;11(28):4686–94.
- 749 20. Seipke RF, Song L, Bicz J, Laskaris P, Yaxley AM, Challis GL, et al. The plant pathogen  
750 *Streptomyces scabies* 87-22 has a functional pyochelin biosynthetic pathway that is regulated  
751 by TetR- and AfsR-family proteins. Microbiology [Internet]. 2011 Sep 1 [cited 2017 Aug  
752 4];157(9):2681–93. Available from: <http://www.ncbi.nlm.nih.gov/pubmed/21757492>
- 753 21. Schlösser A, Jantos J, Hackmann K, Schrempf H. Characterization of the binding protein-  
754 dependent cellobiose and celotriose transport system of the cellulose degrader *Streptomyces*  
755 *reticuli*. Appl Environ Microbiol. 1999;65(6):2636–43.
- 756 22. Francis IM, Jourdan S, Fanara S, Loria R, Rigali S. The cellobiose sensor CebR is the  
757 gatekeeper of *Streptomyces scabies* pathogenicity. MBio. 2015;6(2):1–6.
- 758 23. Jourdan S, Francis IM, Kim MJ, Salazar JJC, Planckaert S, Frère J, et al. The CebE/MsiK  
759 Transporter is a Doorway to the Cello-oligosaccharide-mediated Induction of *Streptomyces*  
760 *scabies* Pathogenicity. Sci Rep [Internet]. 2016;6:1–12. Available from:  
761 <http://dx.doi.org/10.1038/srep27144>
- 762 24. Joshi M V., Bignell DRD, Johnson EG, Sparks JP, Gibson DM, Loria R. The AraC/XylS  
763 regulator TxtR modulates thaxtomin biosynthesis and virulence in *Streptomyces scabies*. Mol  
764 Microbiol. 2007;66(3):633–42.
- 765 25. Johnson EG, Joshi M V., Gibson DM, Loria R. Cello-oligosaccharides released from host  
766 plants induce pathogenicity in scab-causing *Streptomyces* species. Physiol Mol Plant Pathol.  
767 2007;71:18–25.
- 768 26. Book AJ, Lewin GR, McDonald BR, Takasuka TE, Wendt-Pienkowski E, Doering DT, et al.  
769 Evolution of High Cellulolytic Activity in Symbiotic *Streptomyces* through Selection of  
770 Expanded Gene Content and Coordinated Gene Expression. PLoS Biol. 2016;14(6):1–21.
- 771 27. Jourdan S, Francis IM, Deflandre B, Loria R, Rigali S. Tracking the Subtle Mutations Driving  
772 Host Sensing by the Plant Pathogen *Streptomyces scabies*. mSphere. 2017;2(2):1–7.
- 773 28. Liu J, Nothias L-F, Dorrestein PC, Tahlan K, Bignell DRD. Genomic and Metabolomic

- 774 Analysis of the Potato Common Scab Pathogen *Streptomyces scabiei*. ACS Omega [Internet].  
775 2021 May 4;6(17):11474–87. Available from:  
776 <https://pubs.acs.org/doi/10.1021/acsomega.1c00526>
- 777 29. Bolger AM, Lohse M, Usadel B. Trimmomatic: A flexible trimmer for Illumina sequence data.  
778 *Bioinformatics*. 2014;30(15):2114–20.
- 779 30. Langmead B, Salzberg SL. Fast gapped-read alignment with Bowtie 2. *Nat Methods*.  
780 2012;9(4):357–9.
- 781 31. Langmead B, Wilks C, Antonescu V, Charles R. Scaling read aligners to hundreds of threads  
782 on general-purpose processors. *Bioinformatics*. 2019;35(3):421–32.
- 783 32. Liao Y, Smyth GK, Shi W. featureCounts: An efficient general purpose program for assigning  
784 sequence reads to genomic features. *Bioinformatics*. 2014;30(7):923–30.
- 785 33. Love MI, Huber W, Anders S. Moderated estimation of fold change and dispersion for RNA-  
786 seq data with DESeq2. *Genome Biol*. 2014;15(12):1–21.
- 787 34. Blin K, Shaw S, Steinke K, Villebro R, Ziemert N, Lee SY, et al. AntiSMASH 5.0: Updates to  
788 the secondary metabolite genome mining pipeline. *Nucleic Acids Res*. 2019;47(W1):W81–7.
- 789 35. Kautsar SA, Blin K, Shaw S, Navarro-Muñoz JC, Terlouw BR, Van Der Hooft JJJ, et al.  
790 MIBiG 2.0: A repository for biosynthetic gene clusters of known function. *Nucleic Acids Res*.  
791 2020;48(D1):D454–8.
- 792 36. Vicente CM, Thibessard A, Lorenzi J-N, Benhadj M, Hôtel L, Gacemi-Kirane D, et al.  
793 Comparative genomics among closely related *Streptomyces* strains revealed specialized  
794 metabolite biosynthetic gene cluster diversity. *Antibiotics*. 2018;7 (4)(86):1–11.
- 795 37. Ōmura S, Shimizu H, Iwai Y, Hinotozawa K, Otaguro K, Hashimoto H, et al. AM-2604 A, a  
796 new antiviral antibiotic produced by a strain of *Streptomyces*. *J Antibiot (Tokyo)*.  
797 1982;35(12):1632–7.
- 798 38. Dröse S, Altendorf K. Bafilomycins and concanamycins as inhibitors of V-ATPases and P-  
799 ATPases. *J Exp Biol*. 1997;200(Pt1):1–8.
- 800 39. Dröse S, Bindseil KU, Bowman EJ, Siebers A, Zeeck A, Altendorf K. Inhibitory Effect of  
801 Modified Bafilomycins and Concanamycins on P- and V-Type Adenosinetriphosphatases.  
802 *Biochemistry*. 1993;32(15):3902–6.
- 803 40. Hoskisson PA, Seipke RF. Cryptic or silent? The known unknowns, unknown knowns, and  
804 unknown unknowns of secondary metabolism. *MBio*. 2020;11(5):1–5.
- 805 41. Jourdan S, Francis IM, Deflandre B, Tenconi E, Riley J, Planckaert S, et al. Contribution of  
806 the  $\beta$ -glucosidase BglC to the onset of the pathogenic lifestyle of *Streptomyces scabies*. *Mol*  
807 *Plant Pathol*. 2018;19(6):1480–90.
- 808 42. Deflandre B, Thiébaud N, Planckaert S, Jourdan S, Anderssen S, Hanikenne M, et al. Deletion  
809 of *bglC* triggers a genetic compensation response by awakening the expression of alternative  
810 beta-glucosidase. *Biochim Biophys Acta - Gene Regul Mech*. 2020;1863(10).
- 811 43. Bignell DRD, Seipke RF, Hugué-Tapia JC, Chambers AH, Parry RJ, Loria R. *Streptomyces*

- 812 *scabies* 87-22 contains a coronafacic acid-like biosynthetic cluster that contributes to plant-  
813 microbe interactions. *Mol Plant-Microbe Interact.* 2010;23(2):161–75.
- 814 44. Lambert S, Traxler MF, Craig M, Maciejewska M, Ongena M, Van Wezel GP, et al. Altered  
815 desferrioxamine-mediated iron utilization is a common trait of bald mutants of *Streptomyces*  
816 *coelicolor*. *Metallomics.* 2014;6(8):1390–9.
- 817 45. Yamanaka K, Oikawa H, Ogawa H-O, Hosono K, Shinmachi F, Takano H, et al.  
818 Desferrioxamine E produced by *Streptomyces griseus* stimulates growth and development of  
819 *Streptomyces tanashiensis*. *Microbiology.* 2005;151(9):2899–905.
- 820 46. Traxler MF, Seyedsayamdost MR, Clardy J, Kolter R. Interspecies modulation of bacterial  
821 development through iron competition and siderophore piracy. *Mol Microbiol.*  
822 2012;86(3):628–44.
- 823 47. Craig M, Lambert S, Jourdan S, Tenconi E, Colson S, Maciejewska M, et al. Unsuspected  
824 control of siderophore production by N-acetylglucosamine in streptomycetes. *Environ*  
825 *Microbiol Rep.* 2012;4(5):512–21.
- 826 48. Planckaert S, Jourdan S, Francis IM, Deflandre B, Rigali S, Devreese B. Proteomic Response  
827 to Thaxtomin Phytotoxin Elicitor Cellobiose and to Deletion of Cellulose Utilization Regulator  
828 CebR in *Streptomyces scabies*. *J Proteome Res.* 2018;17(11):3837–52.
- 829 49. Bignell DRD, Huguet-Tapia JC, Joshi M V., Pettis GS, Loria R. What does it take to be a plant  
830 pathogen: genomic insights from *Streptomyces* species. In: Antonie van Leeuwenhoek. 2010.  
831 p. 179–94.
- 832 50. Świątek-Połatyńska MA, Bucca G, Laing E, Gubbens J, Titgemeyer F, Smith CP, et al.  
833 Genome-wide analysis of *in vivo* binding of the master regulator DasR in *Streptomyces*  
834 *coelicolor* identifies novel non-canonical targets. *PLoS One.* 2015;10(4):1–24.
- 835 51. Komatsu M, Tsuda M, Omura S, Oikawa H, Ikeda H. Identification and functional analysis of  
836 genes controlling biosynthesis of 2-methylisborneol. *Proc Natl Acad Sci U S A.*  
837 2008;105(21):7422–7.
- 838 52. Seipke RF, Loria R. Hopanoids are not essential for growth of *Streptomyces scabies* 87-22. *J*  
839 *Bacteriol.* 2009;191(16):5216–23.
- 840 53. Jiang J, He X, Cane DE. Biosynthesis of the earthy odorant geosmin by a bifunctional  
841 *Streptomyces coelicolor* enzyme. *Nat Chem Biol.* 2007;3(11):711–5.
- 842 54. Bignell DRD, Fyans JK, Cheng Z. Phytotoxins produced by plant pathogenic *Streptomyces*  
843 species. *J Appl Microbiol.* 2014;116(2):223–35.
- 844 55. Vior NM, Cea-Torrescassana E, Eyles TH, Chandra G, Truman AW. Regulation of  
845 Botromycin Biosynthesis Involves an Internal Transcriptional Start Site and a Cluster-Situated  
846 Modulator. *Front Microbiol.* 2020;11:1–16.
- 847 56. Beauséjour J, Beaulieu C. Characterization of *Streptomyces scabies* mutants deficient in  
848 melanin biosynthesis. *Can J Microbiol.* 2004;50(9):705–9.
- 849 57. Bursy J, Kuhlmann AU, Pittelkow M, Hartmann H, Jebbar M, Pierik AJ, et al. Synthesis and  
850 uptake of the compatible solutes ectoine and 5-hydroxyectoine by *Streptomyces coelicolor*

- 851 A3(2) in response to salt and heat stresses. *Appl Environ Microbiol.* 2008;74(23):7286–96.
- 852 58. Bown L, Li Y, Berru e F, Verhoeven JTP, Dufour SC, Bignell DRD. Coronafacoyl Phytotoxin  
853 Biosynthesis and Evolution in the Common Scab Pathogen *Streptomyces scabiei*. *Appl*  
854 *Environ Microbiol.* 2017;83(19):1–15.
- 855 59. Chemler JA, Buchholz TJ, Geders TW, Akey DL, Rath CM, Chlipala GE, et al. Biochemical  
856 and Structural Characterization of Germicidin Synthase: Analysis of a Type III Polyketide  
857 Synthase that Employs Acyl-ACP as a Starter Unit Donor. *J Am Chem Soc.*  
858 2012;134(17):7359–7366.
- 859 60. Haydock SF, Appleyard AN, Mironenko T, Lester J, Scott N, Leadlay PF. Organization of the  
860 biosynthetic gene cluster for the macrolide concanamycin A in *Streptomyces neyagawaensis*  
861 ATCC 27449. *Microbiology.* 2005;151(10):3161–9.

862

### 863 13. Figures and tables

864

**Table 1. Prediction of BGCs involved in specialized metabolite production in *Streptomyces scabiei* 87-22**

| BGC | BGC genes<br>[old locus tag]           | BGC length<br>(pb) | Product type  | Specialized metabolite | Bioactivity                      | Most similar BGC (%)<br>Species               | Ref / MIBig ID |
|-----|----------------------------------------|--------------------|---------------|------------------------|----------------------------------|-----------------------------------------------|----------------|
| 1a  | SCAB_RS00610-00670<br>[SCAB_1361-1481] | 26675              | Siderophore   | Pyochelin              | Iron uptake                      | Pyochelin (100)<br><i>S. scabiei</i> 87-22    | (20)           |
| 1b  | SCAB_RS00675-00760<br>[SCAB_1491-1671] | 18891              | NRPS          | Cryptic                | Unknown                          | None                                          | NA             |
| 2   | SCAB_RS00870-01005<br>[SCAB_1951-2231] | 34118              | Betalactone   | Cryptic                | Unknown                          | Esmeraldin (4)<br><i>S. antibioticus</i>      | BGC0000935     |
| 3   | SCAB_RS01465-01545<br>[SCAB_3221-3351] | 32892              | NRPS          | Rothibins              | Plant growth inhibitory effect   | Rothibins (100)<br><i>S. scabiei</i> RL-34    | (17)           |
| 4   | SCAB_RS01655-01700<br>[SCAB_3601-3671] | 15765              | Lanthipeptide | Cryptic                | Unknown                          | None                                          | NA             |
| 5   | SCAB_RS02290-02370<br>[SCAB_4951-5131] | 19986              | Terpene       | 2-methylisoborneol     | Smell of soil                    | 2-methylisoborneol (100)<br><i>S. griseus</i> | (51)           |
| 6a  | SCAB_RS02505-02545<br>[SCAB_5421-5511] | 11090              | Terpene       | Isorenieratene         | Light harvesting photoprotection | Isorenieratene (100)<br><i>S. argillaceus</i> | BGC0001456     |
| 6b  | SCAB_RS02550-02590                     | 7346               | Terpene       | Cryptic                | Unknown                          | Guadinomine (4)                               | BGC0000998     |



|     |                                          |       |               |                 |                                  |                                                                  |            |
|-----|------------------------------------------|-------|---------------|-----------------|----------------------------------|------------------------------------------------------------------|------------|
|     | [SCAB_5521-5601]                         |       |               |                 |                                  | <i>S. sp.</i> K01-0509                                           |            |
| 7a  | SCAB_RS04050-04080<br>[SCAB_8601-8661]   | 13988 | Lanthipeptide | Informatipeptin | Antimicrobial                    | Informatipeptin (63)<br><i>S. viridochromogenes</i> DSM<br>40736 | BGC0000518 |
| 7b  | SCAB_RS04085-04095<br>[SCAB_8681-8701]   | 3358  | Bacteriocin   | Cryptic         | Unknown                          | None                                                             | NA         |
| 8   | SCAB_RS05720-05745<br>[SCAB_12041-12091] | 6531  | Butyrolactone | Cryptic         | Unknown                          | Pyocyanine (14)<br><i>P. aeruginosa</i> PA01                     | BGC0000936 |
| 9   | SCAB_RS06125-06180<br>[SCAB_12881-13001] | 13913 | Terpene       | Hopene          | Protection against<br>water loss | Hopene (92)<br><i>S. coelicolor</i> A3(2)                        | (52)       |
| 10  | SCAB_RS08670-08720<br>[SCAB_18341-18441] | 11906 | Siderophore   | Cryptic         | Unknown                          | Grincamycin (9)<br><i>S. lusitanus</i>                           | BGC0000229 |
| 11a | SCAB_RS09255-09340<br>[SCAB_19561-19741] | 27673 | NRPS-like     | Cryptic         | Unknown                          | Stenothricin (11)<br><i>S. filamentosus</i> NRRL 15998           | BGC0000431 |
| 11b | SCAB_RS09350-09410<br>[SCAB_19761-19891] | 11446 | NRPS-like     | Cryptic         | Unknown                          | s56-p1 (43)<br><i>S. cp.</i> Soc090715ln-17                      | BGC0001764 |
| 12  | SCAB_RS09510<br>[SCAB_20121]             | 2207  | Terpene       | Geosmin         | Earthy odorant                   | Geosmin (100)<br><i>S. coelicolor</i> A3(2)                      | (53)       |

|     |                                          |       |                             |                  |               |                                                 |            |
|-----|------------------------------------------|-------|-----------------------------|------------------|---------------|-------------------------------------------------|------------|
| 13  | SCAB_RS09780-09830<br>[SCAB_20701-20801] | 10413 | Bacteriocin                 | Cryptic          | Unknown       | None                                            | NA         |
| 14  | SCAB_RS10905-10995<br>[SCAB_23071-23271] | 20828 | Terpene                     | Cryptic          | Unknown       | FD-594 (7)<br><i>S. sp. Ta-0256</i>             | BGC0000222 |
| 15  | SCAB_RS11635-11660<br>[SCAB_24651-24711] | 9975  | Siderophore                 | Cryptic          | Unknown       | None                                            | NA         |
| 16a | SCAB_RS15070-15100<br>[SCAB_31761-31841] | 18264 | NRPS                        | Thaxtomins       | Phytotoxin    | Thaxtomin A (100)<br><i>S. scabiei</i> 87-22    | (54)       |
| 16b | SCAB_RS15145-15225<br>[SCAB_31961-32131] | 19409 | Lanthipeptide               | Cryptic          | Unknown       | None                                            | NA         |
| 17  | SCAB_RS20585-20630<br>[SCAB_43271-43361] | 9782  | Type 2 PKS                  | Spore pigment    | Pigment       | Spore pigment (75)<br><i>S. avermitilis</i>     | BGC0000271 |
| 18  | SCAB_RS20845-20995<br>[NA-44151]         | 42317 | NRPS, Type 1 PKS            | Cryptic          | Unknown       | None                                            | NA         |
| 19  | SCAB_RS22630-22710<br>[SCAB_47531-47711] | 21090 | Lanthipeptide               | Cryptic          | Unknown       | None                                            | NA         |
| 20  | SCAB_RS26995-27050<br>[SCAB_56591-56711] | 17166 | Bacteriocin,<br>bottromycin | Bottromycins     | Antibacterial | Bottromycin A2 (100)<br><i>S. scabiei</i> 87-22 | (55)       |
| 21  | SCAB_RS27660-27675<br>[SCAB_57921-57951] | 5032  | Siderophore                 | Desferrioxamines | Iron uptake   | Desferrioxamines (100)<br><i>S. sp. Id38640</i> | BGC0001478 |

|     |                                          |       |               |         |                |                                                                       |            |
|-----|------------------------------------------|-------|---------------|---------|----------------|-----------------------------------------------------------------------|------------|
| 22  | SCAB_RS28265-28270<br>[SCAB_59231-59241] | 1290  | Melanin       | Melanin | Pigment        | Melanin (100)<br><i>S. griseus</i>                                    | (56)       |
| 23a | SCAB_RS30025-30125<br>[SCAB_62881-63081] | 30803 | Type 1 PKS    | Cryptic | Unknown        | None                                                                  | NA         |
| 23b | SCAB_RS30085-30160<br>[NA-63151]         | 23408 | Butyrolactone | Cryptic | Unknown        | None                                                                  | NA         |
| 23c | SCAB_RS30120-30205<br>[NA-63271]         | 24765 | LAP           | Cryptic | Unknown        | None                                                                  | NA         |
| 23d | SCAB_RS30125-30265<br>[SCAB_63081-63401] | 37334 | PKS-like      | Cryptic | Unknown        | None                                                                  | NA         |
| 24  | SCAB_RS33835-33850<br>[SCAB_70711-70741] | 3166  | Ectoine       | Ectoine | Osmoprotectant | Ectoine (100)<br><i>S. scabiei</i> 87-22                              | (57)       |
| 25  | SCAB_RS34860-34975<br>[SCAB_72851-73081] | 24960 | NRPS-like     | Cryptic | Unknown        | None                                                                  | NA         |
| 26  | SCAB_RS35245-35325<br>[SCAB_73651-73801] | 17977 | Terpene       | Cryptic | Unknown        | None                                                                  | NA         |
| 27a | SCAB_RS37770-37840<br>[SCAB_78881-79041] | 23685 | Type 1 PKS    | Cryptic | Unknown        | None                                                                  | NA         |
| 27b | SCAB_RS37860-37955<br>[SCAB_79081-79081] | 27749 | Indole        | Cryptic | Unknown        | 5-isoprenylindole-3-<br>carboxylate $\beta$ -D-glycosyl<br>ester (14) | BGC0001483 |

|     |                                          |       |             |                             |                                                                                   |                                                              |            |
|-----|------------------------------------------|-------|-------------|-----------------------------|-----------------------------------------------------------------------------------|--------------------------------------------------------------|------------|
|     |                                          |       |             |                             |                                                                                   | S. Sp. RM-5-8                                                |            |
| 28  | SCAB_RS38095-38165<br>[SCAB_79581-79721] | 31375 | Type 1 PKS  | Coronafacoyl<br>phytotoxins | Phytotoxin                                                                        | Coronafacoyl phytotoxin,<br>(100)<br><i>S. scabiei</i> 87-22 | (58)       |
| 29a | SCAB_RS38310-38370<br>[SCAB_80021-80131] | 15153 | Type 3 PKS  | Cryptic                     | Unknown                                                                           | Daptomycin (11)<br><i>S. filamentosus</i> NRRL 11379         | BGC0000336 |
| 29b | SCAB_RS38390<br>[SCAB_80171]             | 1184  | Type 3 PKS  | Germicidin                  | Inhibitor of<br>germination                                                       | Germicidin (100)<br><i>S. scabiei</i> 87-22                  | (59)       |
| 30  | SCAB_RS39275-39320<br>[SCAB_82111-NA]    | 14262 | Terpene     | Cryptic                     | Unknown                                                                           | None                                                         | NA         |
| 31a | SCAB_RS40100-40220<br>[SCAB_83841-84101] | 94968 | Type 1 PKS  | Concanamycins               | Cytotoxic<br>(antifungal,<br>antineoplastic,<br>anti- protozoal<br>and antiviral) | Concanamycin A (89)<br><i>S. neyagawaensis</i>               | (49,60)    |
| 31b | SCAB_RS40225-40290<br>[NA-84261]         | 13911 | Linaridin   | Cryptic                     | Unknown                                                                           | None                                                         | NA         |
| 32  | SCAB_RS40385-40435<br>[SCAB_84461-84561] | 13579 | Siderophore | Cryptic                     | Unknown                                                                           | None                                                         | NA         |

|     |                                          |       |         |             |             |                                              |            |
|-----|------------------------------------------|-------|---------|-------------|-------------|----------------------------------------------|------------|
| 33a | SCAB_RS40855-40900<br>[SCAB_85431-85521] | 30019 | NRPS    | Scabichelin | Iron uptake | Scabichelin (100)<br><i>S. scabiei</i> 87-22 | (19)       |
| 33b | SCAB_RS40955-41010<br>[SCAB_85631-85741] | 9584  | Melanin | Melanin     | Pigment     | Melanin (57)<br><i>S. avermitilis</i>        | BGC0000908 |
| 34  | SCAB_RS41165-41255<br>[SCAB_86081-86261] | 19524 | Terpene | Cryptic     | Unknown     | None                                         | NA         |

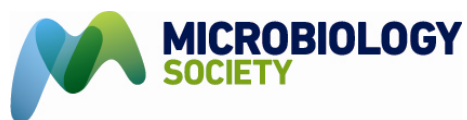

**Figure 1. Relative production of the specialized metabolites of *S. scabiei* 87-22 upon addition of cello-oligosaccharides.** Production levels were assessed in four culture conditions: TDM + maltose 0.5% (TDMm, grey) supplemented with 2.5 mM of cellobiose (+Cellobiose, yellow), cellotriase (+Cellotriase, red) or sucrose (+Sucrose, black). Bar plots display the Area Under the Curve (AUC) of ion peaks normalized to the first replicate of the TDMm condition for each metabolite. Three biological replicates were performed for each culture condition and error bars display the standard deviation observed between three technical replicates.

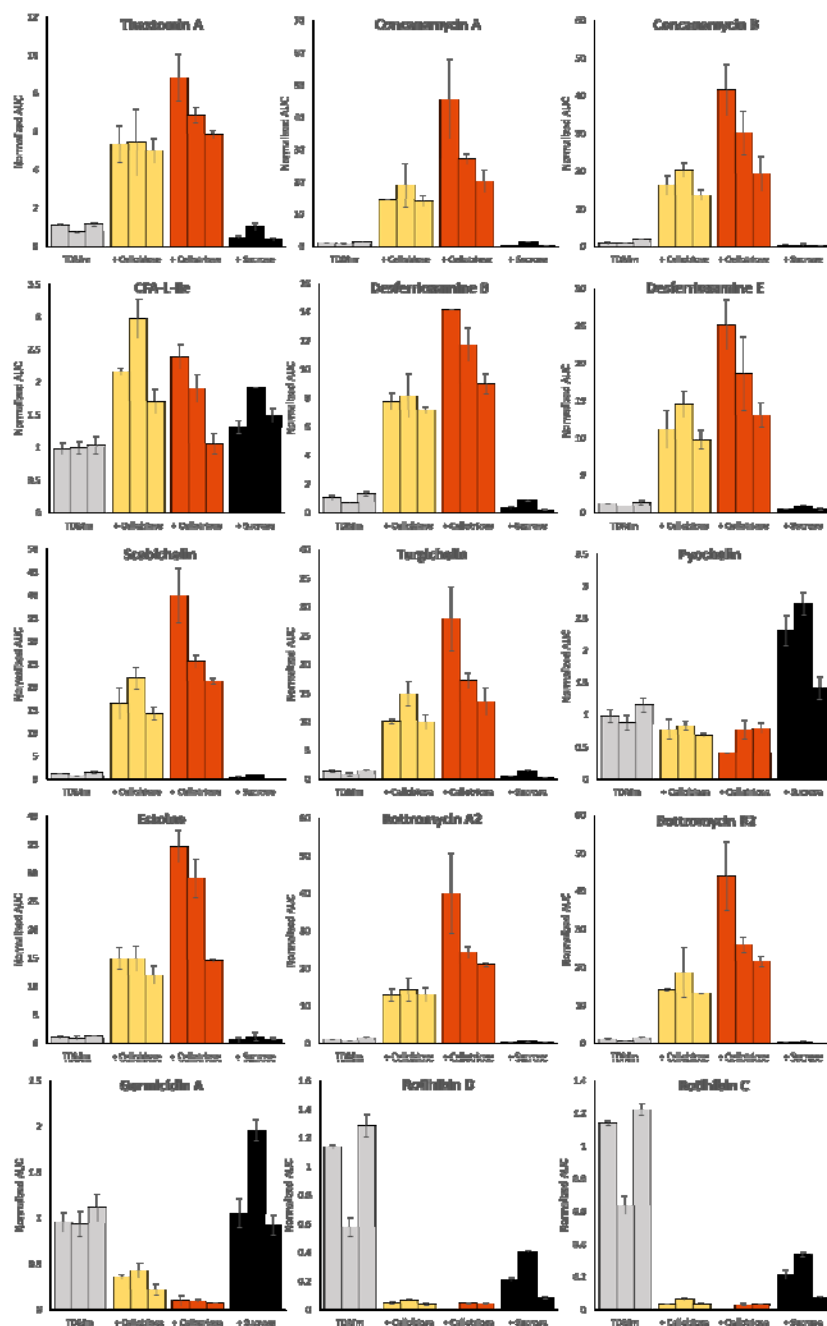

**Table 2. Transcriptional response of BGCs (core genes) upon cellobiose and cellotriose supply**

| BGC | Product | Log2 FC (Glc) <sub>2</sub> | Log2 FC (Glc) <sub>3</sub> | BGC | Product | Log2 FC (Glc) <sub>2</sub> | Log2 FC (Glc) <sub>3</sub> |
|-----|---------|----------------------------|----------------------------|-----|---------|----------------------------|----------------------------|
|     |         |                            |                            |     |         |                            |                            |

|     |                    |        |        |     |                           |        |        |
|-----|--------------------|--------|--------|-----|---------------------------|--------|--------|
| 1   | pyochelin          | + 1.28 | + 0.94 | 19  | cryptic                   | + 0.33 | -      |
| 1b  | cryptic            | + 2.15 | + 2.39 | 20  | botromycins               | - 0.89 | -0.15  |
| 2   | cryptic            | -      | + 2.64 | 21  | desferrioxamines          | + 3.56 | + 3.63 |
| 3   | rotihibins         | - 0.48 | - 0.41 | 22  | melanin                   | -      | + 2.76 |
| 4   | cryptic            | + 0.47 | -      | 23a | cryptic                   | + 0.81 | -      |
| 5   | 2-methylisoborneol | + 1.58 | + 1.69 | 23b | cryptic                   | -      | + 0.85 |
| 6a  | isorenieratene     | - 0.37 | + 0.36 | 23c | cryptic                   | -      | + 0.85 |
| 6b  | cryptic            | -      | -      | 23d | cryptic                   | -      | + 0.85 |
| 7a  | informatipeptin    | -      | -      | 24  | ectoine                   | - 0.30 | - 1.39 |
| 7b  | cryptic            | + 1.08 | + 2.40 | 25  | cryptic                   | + 1.19 | + 0.40 |
| 8   | cryptic            | -      | -      | 26  | cryptic                   | - 0.53 | - 0.59 |
| 9   | hopene             | - 0.81 | + 0.94 | 27a | cryptic                   | -      | -      |
| 10  | cryptic            | - 0.24 | - 0.71 | 27b | cryptic                   | + 0.86 | + 0.56 |
| 11a | cryptic            | -      | -      | 28  | CFA-Ile                   | + 3.75 | + 4.25 |
| 11b | cryptic            | -      | -      | 29a | germicidins               | -      | -      |
| 12  | geosmin            | - 1.09 | - 0.85 | 29b | cryptic                   | -      | -      |
| 13  | cryptic            | + 1.73 | + 1.71 | 30  | cryptic                   | -      | -      |
| 14  | cryptic            | + 1.35 | + 0.75 | 31a | concanamycins             | + 1.38 | + 1.44 |
| 15  | cryptic            | + 1.51 | + 1.43 | 31b | cryptic                   | -      | -      |
| 16a | thaxtomins         | + 5.16 | + 3.06 | 32  | cryptic                   | + 3.92 | + 3.21 |
| 16b | cryptic            | + 0.55 | + 0.66 | 33a | scabichelin / turgichelin | + 3.62 | + 3.18 |
| 17  | WhiE spore pigment | -      | -      | 33b | melanin                   | -      | -      |
| 18  | cryptic            | - 0.47 | - 0.47 | 34  | cryptic                   | -      | -      |

**Figure 2. Expression response of core genes of the known BGCs in presence of cellobiose (A) and cellotriose (B).**



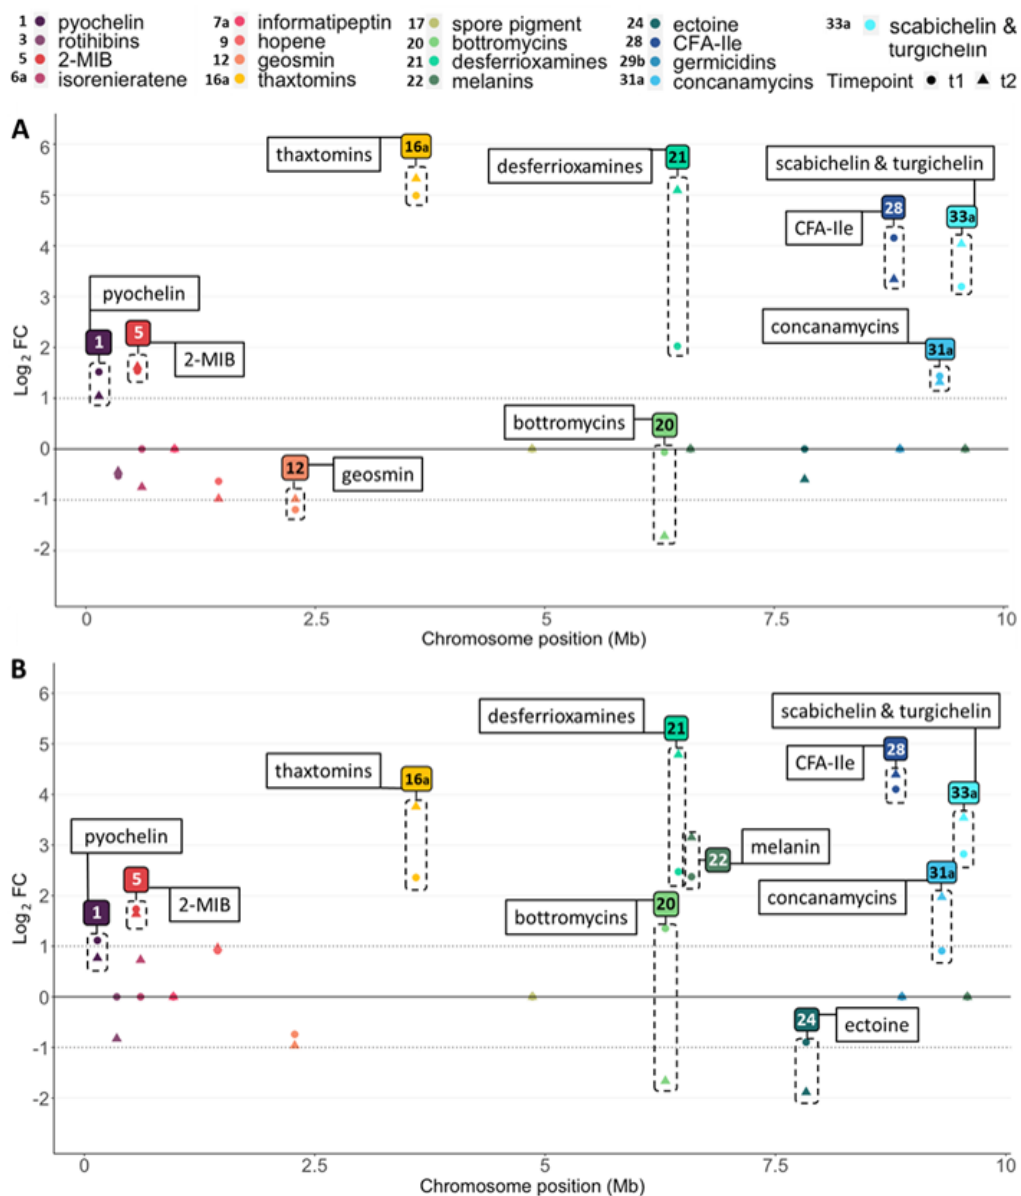

The RNA-seq transcriptomic analysis of *S. scabiei* was conducted in TDM medium (maltose 0.5%) in the presence of cellobiose (A) and cellotriose (B) at time point t1: 1 hour (indicated by circle) and time point t2: 2 hours (indicated by triangle) after induction. The x-axis presents the position of BGCs on the chromosome and the y-axis presents the  $\text{Log}_2$  of the expression fold-change (FC) compared to time point 0 (just before cello-oligosaccharide addition). Only data with significant fold-changes ( $p\text{-value} < 0.05$ ) are displayed (BGCs not meeting this criterium have been set to 0). BGCs with a fold-change above or below the threshold  $-1 > \text{Log}_2\text{FC} > 1$  (at least one time point) are highlighted by a dotted frame.

**Figure 3. Profile of expression level of core genes of the cryptic BGCs in the presence of cellobiose and cellotriose at two time points.**

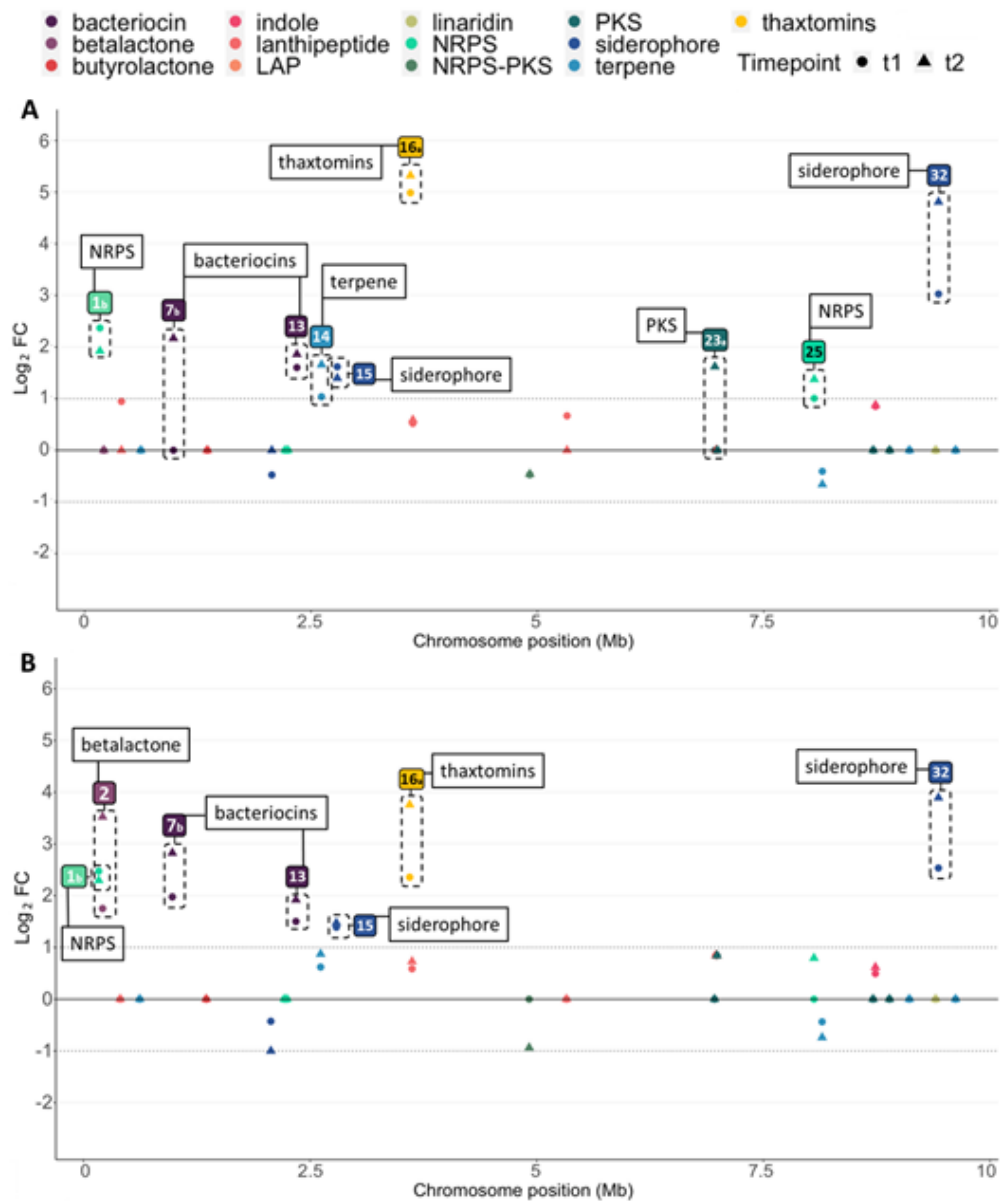

The RNA-seq transcriptomic analysis of *S. scabiei* was conducted in TDM medium (maltose 0.5%) in presence of a) cellobiose and b) cellotriose at time point t1: 1 hour (indicated by circle) and time point t2: 2 hours (indicated by triangle) after induction. The x-axis presents the position of BGCs on the chromosome, whereas the y-axis presents the Log<sub>2</sub> of the expression fold-change (FC) compared to time point 0 (just before cello-oligosaccharide addition). Only data with significant fold-changes (p-value < 0.05) are displayed (BGCs not meeting this criterium have been set to 0). BGCs with a fold-change above or below the threshold  $-1 > \text{Log}_2\text{FC} > 1$  (at least one time point) are highlighted by a dotted frame.



**Figure 4. Volcano plot displaying differentially expressed core BGC genes between the *S. scabiei* wild-type strain and the  $\Delta cebR$  mutant.**

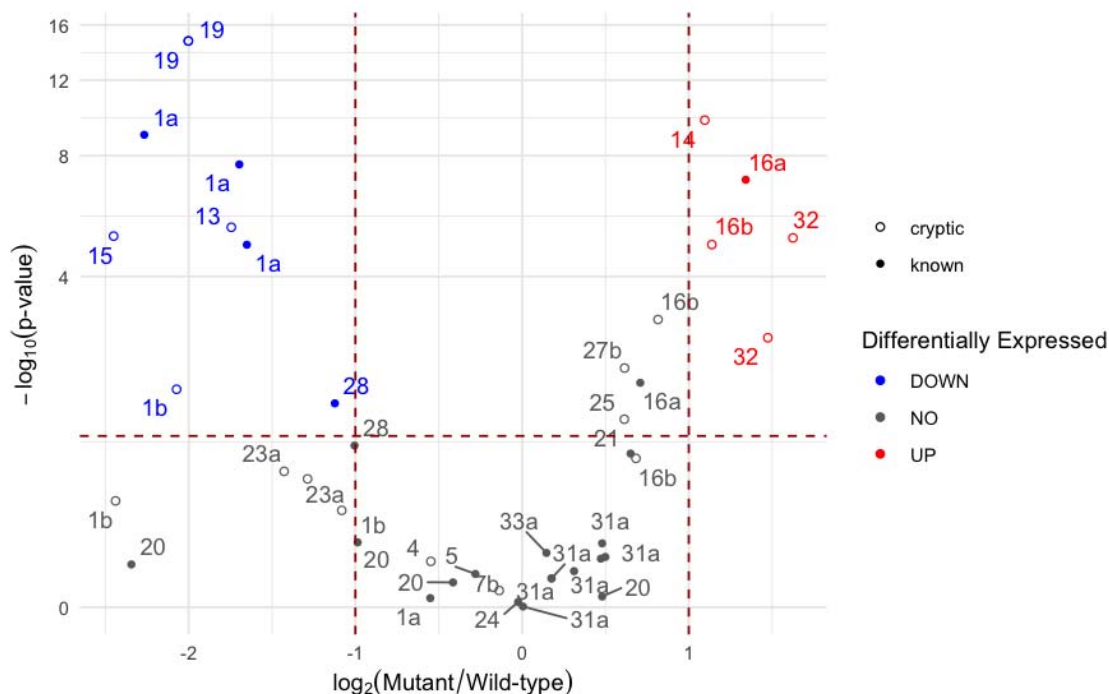

Genes belonging to cryptic BGCs are represented by an empty circle, and those from known BGCs by a full one. Colours indicate the differential expression of each core gene in the  $\Delta cebR$  mutant strain relative to the WT: upregulated (red), downregulated (blue), no significant change (grey). The x-axis displays the Log<sub>2</sub> fold-change (FC) between the mutant and the WT, while the y-axis corresponds to the -Log<sub>10</sub> (p-value). Significant expression changes were defined as having a p-value < 0.05 and a Log<sub>2</sub>FC above or below the given threshold, 1 and -1 respectively ( $-1 > \text{Log}_2\text{FC} > 1$ ), these limits are represented by dotted red lines on the plot.



**Supplementary Figure S1. Detailed expression fold changes (expressed as Log<sub>2</sub>) for individual genes of the *txt* cluster (BGC#16a) in cellobiose and cellotriose after 1 or 2 hours of incubation. ND = Not Detected**

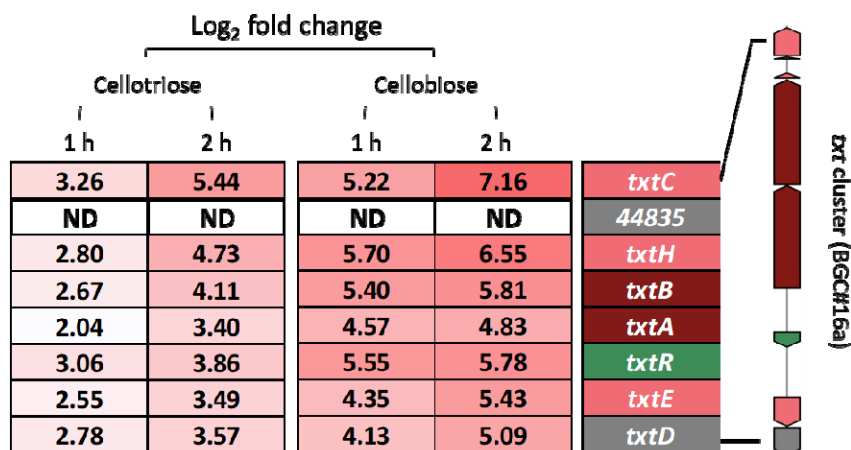

## Supplementary Table S1. The MS conditions for the metabolites of interest in MRM mode.

| <b>Compound name</b> | <b>Parent (m/z)</b> | <b>Daughter ions(m/z)</b>                                            | <b>Dwell (s)</b> |
|----------------------|---------------------|----------------------------------------------------------------------|------------------|
| <b>Method 1</b>      |                     |                                                                      |                  |
| Thaxtomin A          | 439.16              | 362.11 – 247.11 – 219.11                                             | 0.014            |
| Concanamycin A       | 888.51              | 679.42 – 515.3 – 502.29 – 396.2 – 378.19 – 348.19 – 196.06           | 0.014            |
| Concanamycin B       | 874.49              | 501.28 – 396.2 – 378.19                                              | 0.014            |
| CFA-L-Ile            | 322.2               | 191.1 – 163.11 – 145.1 – 119.06                                      | 0.117            |
| Desferrioxamine B    | 561.37              | 443.32 – 401.29 – 361.32 – 319.3 – 243.19 – 201.17                   | 0.014            |
| Desferrioxamine E    | 601.36              | 401.24 – 283.27 – 231.91 – 201.24                                    | 0.014            |
| Scabichelin          | 648.37              | 518.28 – 346.2 – 259.65                                              | 0.014            |
| Turgichelin          | 621.32              | 449.23 – 362.2 – 235.06 – 218.11                                     | 0.014            |
| Pyochelin            | 325.06              | 189.98 – 172 – 145.95 – 127.96                                       | 0.117            |
| Bottromycin A2       | 823.45              | 637.4 – 494.33 – 476.32 – 363.24 – 315.1                             | 0.014            |
| Bottromycin B2       | 809.45              | 623.4 – 480.31 – 462.33 – 349.22 – 315.1                             | 0.014            |
| Bottromycin D2       | 809.44              | 623.4 – 494.34 – 476.32 – 363.23 – 301.1                             | 0.014            |
| Bottromycin E2       | 795.41              | 609.37 – 466.31 – 448.3 – 349.24 – 315.1                             | 0.014            |
| Germicidin A         | 197.12              | 168.08 – 151.07 – 123.12 – 97.03 – 81.07                             | 0.014            |
| Germicidin B         | 183.1               | 168.08 – 137.1 – 109.1 – 67.05                                       | 0.014            |
| Ectoine              | 143.08              | 125.06 – 120.02 – 102.09 – 97.08                                     | 0.014            |
| <b>Method 2</b>      |                     |                                                                      |                  |
| Rotihibin C          | 860.62              | 742.55 – 594.48 – 551.36 – 450.31 – 310.28 – 285.2 – 249.16 – 202.15 | 0.051            |
| Rotihibin D          | 874.61              | 756.55 – 608.48 – 551.36 – 450.31 – 324.28 – 285.2 – 249.16 – 202.15 | 0.051            |
| IAA                  | 175.7               | 129.9 – 102.9 – 77.1                                                 | 0.105            |
| Cydo(L-Val-L-Pro)    | 197.13              | 70.07                                                                | 0.296            |
| Aerugine             | 210.06              | 120.04 – 91.02 – 73.01                                               | 0.051            |
| Andrachnidine        | 228.2               | 186.19 – 151.15 – 95.09                                              | 0.051            |

## Supplementary Figure S1. Relative production of the specialized metabolites of *S. scabiei* 87-22 upon addition of cello-oligosaccharides.

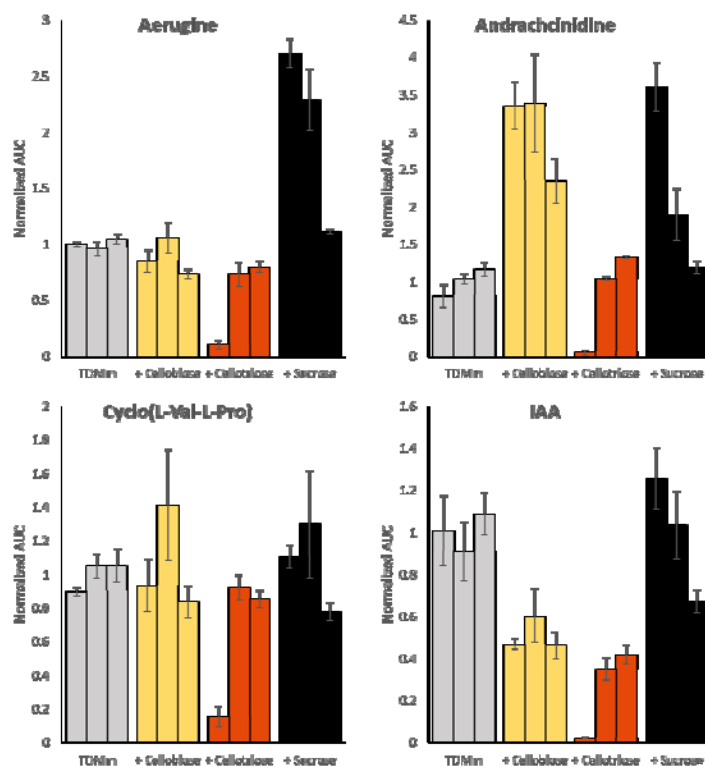

Production levels were assessed in four culture conditions: TDM + maltose 0.5% (TDMm, grey) supplemented with 2.5 mM of cellobiose (+Cellobiose, yellow), cellotriose (+Cellotriose, red) or sucrose (+Sucrose, black). Bar plots display the Area Under the Curve (AUC) of ion peaks normalized to the first replicate of the TDMm condition for each metabolite. Three biological replicates were performed for each culture condition and error bars display the standard deviation observed between three technical replicates.





## Supplementary Table S2. List of the core biosynthetic gene(s) and their predicted function for each BGC

| BGC       | Old locus tag | Locus tag                  | Gene function                                                    | Specialized metabolite    |
|-----------|---------------|----------------------------|------------------------------------------------------------------|---------------------------|
| 1a        | SCAB_1411     | SCAB_R82633                | AMF-binding protein                                              | Pyochelin                 |
|           | SCAB_1471     | SCAB_R82633                | Amino acid adenylation domain containing protein                 |                           |
|           | SCAB_1481     | SCAB_R826470               | Non-ribosomal peptide synthetase                                 |                           |
| 1b        | SCAB_1541     | SCAB_R826475               | Fatty acyl-AMF ligase                                            | Cryptic                   |
|           | SCAB_1551     | SCAB_R826480               | Fatty acyl-AMF ligase                                            |                           |
|           | SCAB_1561     | SCAB_R826480               | AMF-binding protein                                              |                           |
| 2         | SCAB_2011     | SCAB_R826920               | AMF-binding protein                                              | Lysine                    |
|           | SCAB_2041     | SCAB_R826915               | Acyl-Lys ligase                                                  |                           |
|           | SCAB_2071     | SCAB_R826910               | 6-hydroxy-2-norvaline- $\alpha$ aldolase                         |                           |
|           | SCAB_2111     | SCAB_R826920               | long-chain fatty acid-CoA ligase                                 |                           |
| 3         | SCAB_3211     | SCAB_R821425               | Non-ribosomal peptide synthetase                                 | Roethlisin                |
|           | SCAB_3261     | SCAB_R821485               | Fatty acyl-AMF ligase                                            |                           |
|           | NA            | SCAB_R821525               | Non-ribosomal peptide synthetase                                 |                           |
| 4         | SCAB_3811     | SCAB_R821475               | Phosphotransferase                                               | Cryptic                   |
| 5         | SCAB_3941     | SCAB_R821390               | Tanpaga synthase family protein                                  | 2-methylthioacetol        |
| 6a        | SCAB_3441     | SCAB_R821515               | Phycocyanin/squalene synthase family protein                     | Keroneinsinone            |
|           | SCAB_3461     | SCAB_R821535               | WAO(F) binding protein                                           |                           |
| 7a        | SCAB_3811     | SCAB_R824935               | Protein kinase/lanthionine synthase C family protein             | Intermeclopin             |
| 7b        | SCAB_3881     | SCAB_R824935               | tyrosinase protein                                               | Cryptic                   |
| 8         | SCAB_3231     | SCAB_R829740               | AhnA/Scar-like protein                                           | Cryptic                   |
| 9         | SCAB_3791     | SCAB_R828160               | hydroxy-methylase                                                | Hesperin                  |
|           | SCAB_3291     | SCAB_R828175               | Pratocystane dihydroxylase synthase IIa/D                        |                           |
|           | SCAB_3301     | SCAB_R828180               | Squalene synthase NonC                                           |                           |
| 10        | SCAB_3891     | SCAB_R828285               | Iron transporter                                                 | Cryptic                   |
| 11a       | SCAB_3901     | SCAB_R828700               | lucA/ wsc 2-family siderophore biosynthesis protein              | Cryptic                   |
| 11b       | SCAB_3991     | SCAB_R828715               | Non-ribosomal peptide synthetase                                 | Cryptic                   |
| 12        | SCAB_3011     | SCAB_R828710               | terpenes synthase family protein                                 | Gesnerin                  |
| 13        | SCAB_30701    | SCAB_R828710               | 2UF982 domain-containing protein                                 | Cryptic                   |
| 14        | SCAB_3311     | SCAB_R810980               | 21 trans-poly cis copolymerization transferase                   | Cryptic                   |
| 15        | SCAB_3481     | SCAB_R811890               | Iron transporter                                                 | Cryptic                   |
| 16a       | SCAB_3171     | SCAB_R811480               | Amino acid adenylation domain-containing protein                 | Thaxtomins                |
|           | SCAB_3171     | SCAB_R811480               | Amino acid adenylation domain-containing protein                 |                           |
|           | SCAB_3171     | SCAB_R811475               | lanthionine synthetase                                           |                           |
| 16b       | SCAB_3231     | SCAB_R811480               | lanthionine synthetase C family protein                          | Cryptic                   |
| 17        | SCAB_3301     | SCAB_R829200               | tyrosinase protein                                               | Spore pigment             |
|           | SCAB_4311     | SCAB_R829205               | Polychlorinated p-terphenyl synthase                             |                           |
| 18        | SCAB_3381     | SCAB_R829205               | hybrid non-ribosomal peptide synthetase/type polyketide synthase | Cryptic                   |
| 19        | SCAB_3461     | SCAB_R827475               | Protein kinase/lanthionine synthetase C family protein           | Lysine                    |
|           | SCAB_3461     | SCAB_R827475               | NRP maturation radical SAM protein I                             |                           |
|           | SCAB_3461     | SCAB_R827470               | Alone/late hydrolase                                             |                           |
| 20        | SCAB_3021     | SCAB_R827625               | RIPF maturation radical SAM protein I                            | Biotremycin               |
|           | SCAB_3021     | SCAB_R827620               | RIPF maturation radical SAM protein I                            |                           |
| 21        | SCAB_3781     | SCAB_R827620               | lucA/ wsc 2-family siderophore biosynthesis protein              | Dactylosporin             |
| 22        | SCAB_3821     | SCAB_R828285               | Tyrosinase co-factor                                             | Melanin                   |
| 23a       | SCAB_3241     | SCAB_R826935               | Acyltransferase co-activating protein                            | Cryptic                   |
|           | SCAB_3251     | SCAB_R826100               | tyrosinase protein                                               |                           |
| 23b       | SCAB_3311     | SCAB_R826140               | Secondary metabolite corepressor                                 | Cryptic                   |
|           | NA            | SCAB_R826155               | SagB/ThoX 2-family cytochrome                                    |                           |
|           | SCAB_3311     | SCAB_R826100               | TOXMI precursor linear peptide-binding protein                   |                           |
|           | SCAB_3311     | SCAB_R826140               | Secondary metabolite corepressor                                 |                           |
| 23c       | NA            | SCAB_R826140               | SagB/ThoX 2-family cytochrome                                    | Cryptic                   |
|           | NA            | SCAB_R826140               | SagB/ThoX 2-family cytochrome                                    |                           |
|           | SCAB_3311     | SCAB_R826140               | TOXMI precursor linear peptide-binding protein                   |                           |
|           | SCAB_3311     | SCAB_R826140               | Secondary metabolite corepressor                                 |                           |
| 23d       | SCAB_3311     | SCAB_R826140               | Secondary metabolite corepressor                                 | Cryptic                   |
|           | NA            | SCAB_R826155               | SagB/ThoX 2-family cytochrome                                    |                           |
|           | SCAB_3311     | SCAB_R826100               | TOXMI precursor linear peptide-binding protein                   |                           |
|           | SCAB_3311     | SCAB_R826140               | Secondary metabolite corepressor                                 |                           |
|           | SCAB_3311     | SCAB_R826140               | Secondary metabolite corepressor                                 |                           |
| 24        | SCAB_3071     | SCAB_R825840               | Ecotin synthase                                                  | Ecotin                    |
| 25        | SCAB_3291     | SCAB_R824930               | Formate dehydrogenase                                            | Cryptic                   |
| 26        | SCAB_3741     | SCAB_R825280               | tyrosinase protein                                               | Cryptic                   |
| 27a       | SCAB_3891     | SCAB_R827805               | Acyltransferase co-activating protein                            | Cryptic                   |
| 27b       | SCAB_3921     | SCAB_R827805               | 1-tyrosinase                                                     | Lysine                    |
| 28        | SCAB_3901     | SCAB_R828170               | Type I polyketide synthase                                       | Coronafacoyl phytoalexin  |
| SCAB_3901 | SCAB_R828175  | Type I polyketide synthase |                                                                  |                           |
| 29b       | SCAB_30171    | SCAB_R828180               | Polyketide synthase                                              | Garosidin                 |
| 30        | SCAB_3211     | SCAB_R829205               | Cyclase                                                          | Cryptic                   |
| 31a       | SCAB_3371     | SCAB_R826120               | Type I polyketide synthase                                       | Lanthanocyclin            |
|           | SCAB_3391     | SCAB_R826115               | Type I polyketide synthase                                       |                           |
|           | SCAB_3391     | SCAB_R826120               | Type I polyketide synthase                                       |                           |
|           | SCAB_3391     | SCAB_R826125               | Type I polyketide synthase                                       |                           |
|           | SCAB_3391     | SCAB_R826130               | Type I polyketide synthase                                       |                           |
|           | SCAB_3391     | SCAB_R826135               | Type I polyketide synthase                                       |                           |
| 31b       | SCAB_3411     | SCAB_R826250               | tyrosinase protein                                               | Lysine                    |
| 32        | SCAB_3411     | SCAB_R826250               | hydroxylase biosynthesis protein                                 | Cryptic                   |
|           | SCAB_3411     | SCAB_R826250               | Iron transporter                                                 |                           |
| 33a       | SCAB_3461     | SCAB_R826275               | Non-ribosomal peptide synthetase                                 | Isobornicin / Isogornicin |
| 33b       | SCAB_3501     | SCAB_R826285               | Tyrosinase                                                       | Melanin                   |
| 34        | NA            | SCAB_R821210               | Squalene/phytosterol synthase family protein                     | Cryptic                   |
